# Supplementary material
Source: publisher figshare collection journal article supplement (https://gsapubs.figshare.com/articles/dataset/_/24512998)
Supplement: Supplementary file 1 [file 1]

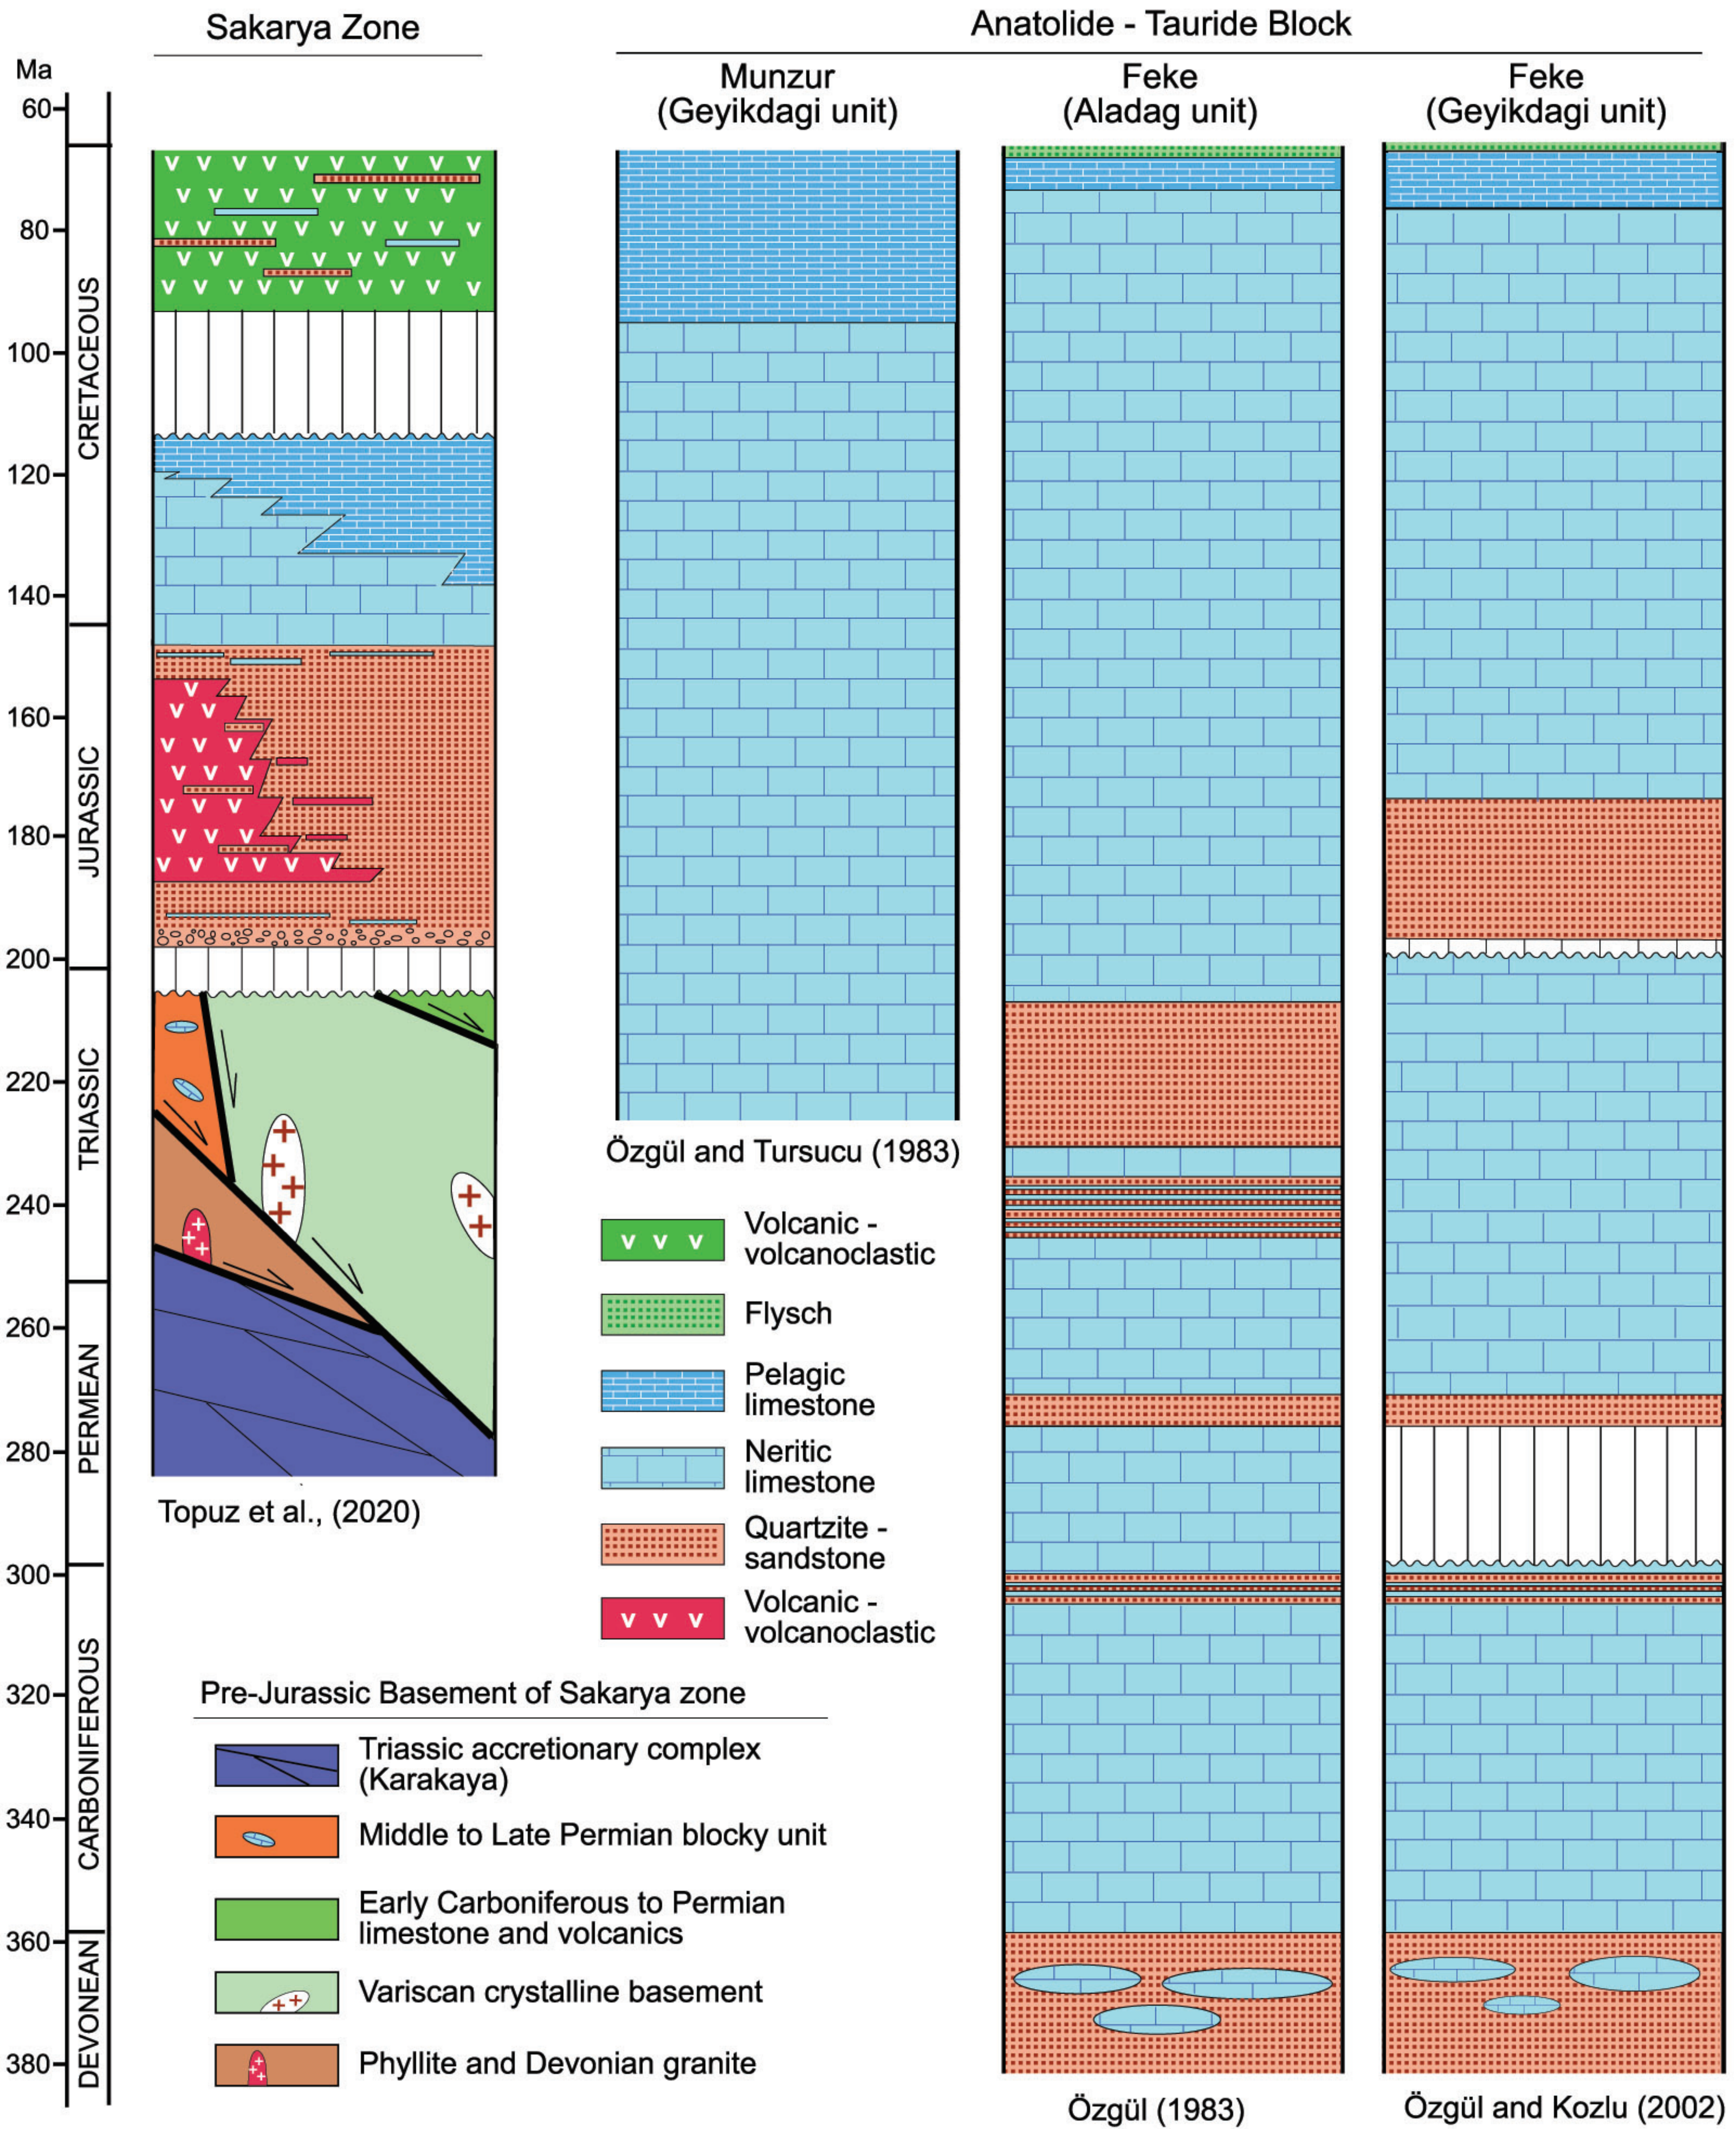

Özgül, N., 1983, Stratigraphy and tectonic evolution of the central Taurides. International symposium on the geology of the Taurus belt, Ankara, Geology of Taurus belt, edited by Okan Tekeli and M. Cemal Göncüoğlu, 76-90.

Özgül, N., and Tursucu, A., 1983, Stratigraphy of the Mesozoic carbonate sequence of the Munzur Mountains (eastern Taurides). International symposium on the geology of the Taurus belt, Ankara, Geology of Taurus belt, edited by Okan Tekeli and M. Cemal Göncüoğlu, 166-173.

Özgül, N., and Kozlu, H., 2002, Kozan-Feke (Dogu Toroslar) yöresinin stratigrafisi ve yapısal konumu ile ilgili bulgular. TPJD Bülteni, 14 / 1, 1-36.

Topuz, G., Candan, O., Okay, I.A., von Quadt, A., Othman, M., Zack, T., and Wang, J., 2020, Silurian anorogenic basic and asidic magmatism in Northwest Turkey: Implication for the opening of the Paleo-Tethys. Lithos, 356-357, 105 302.



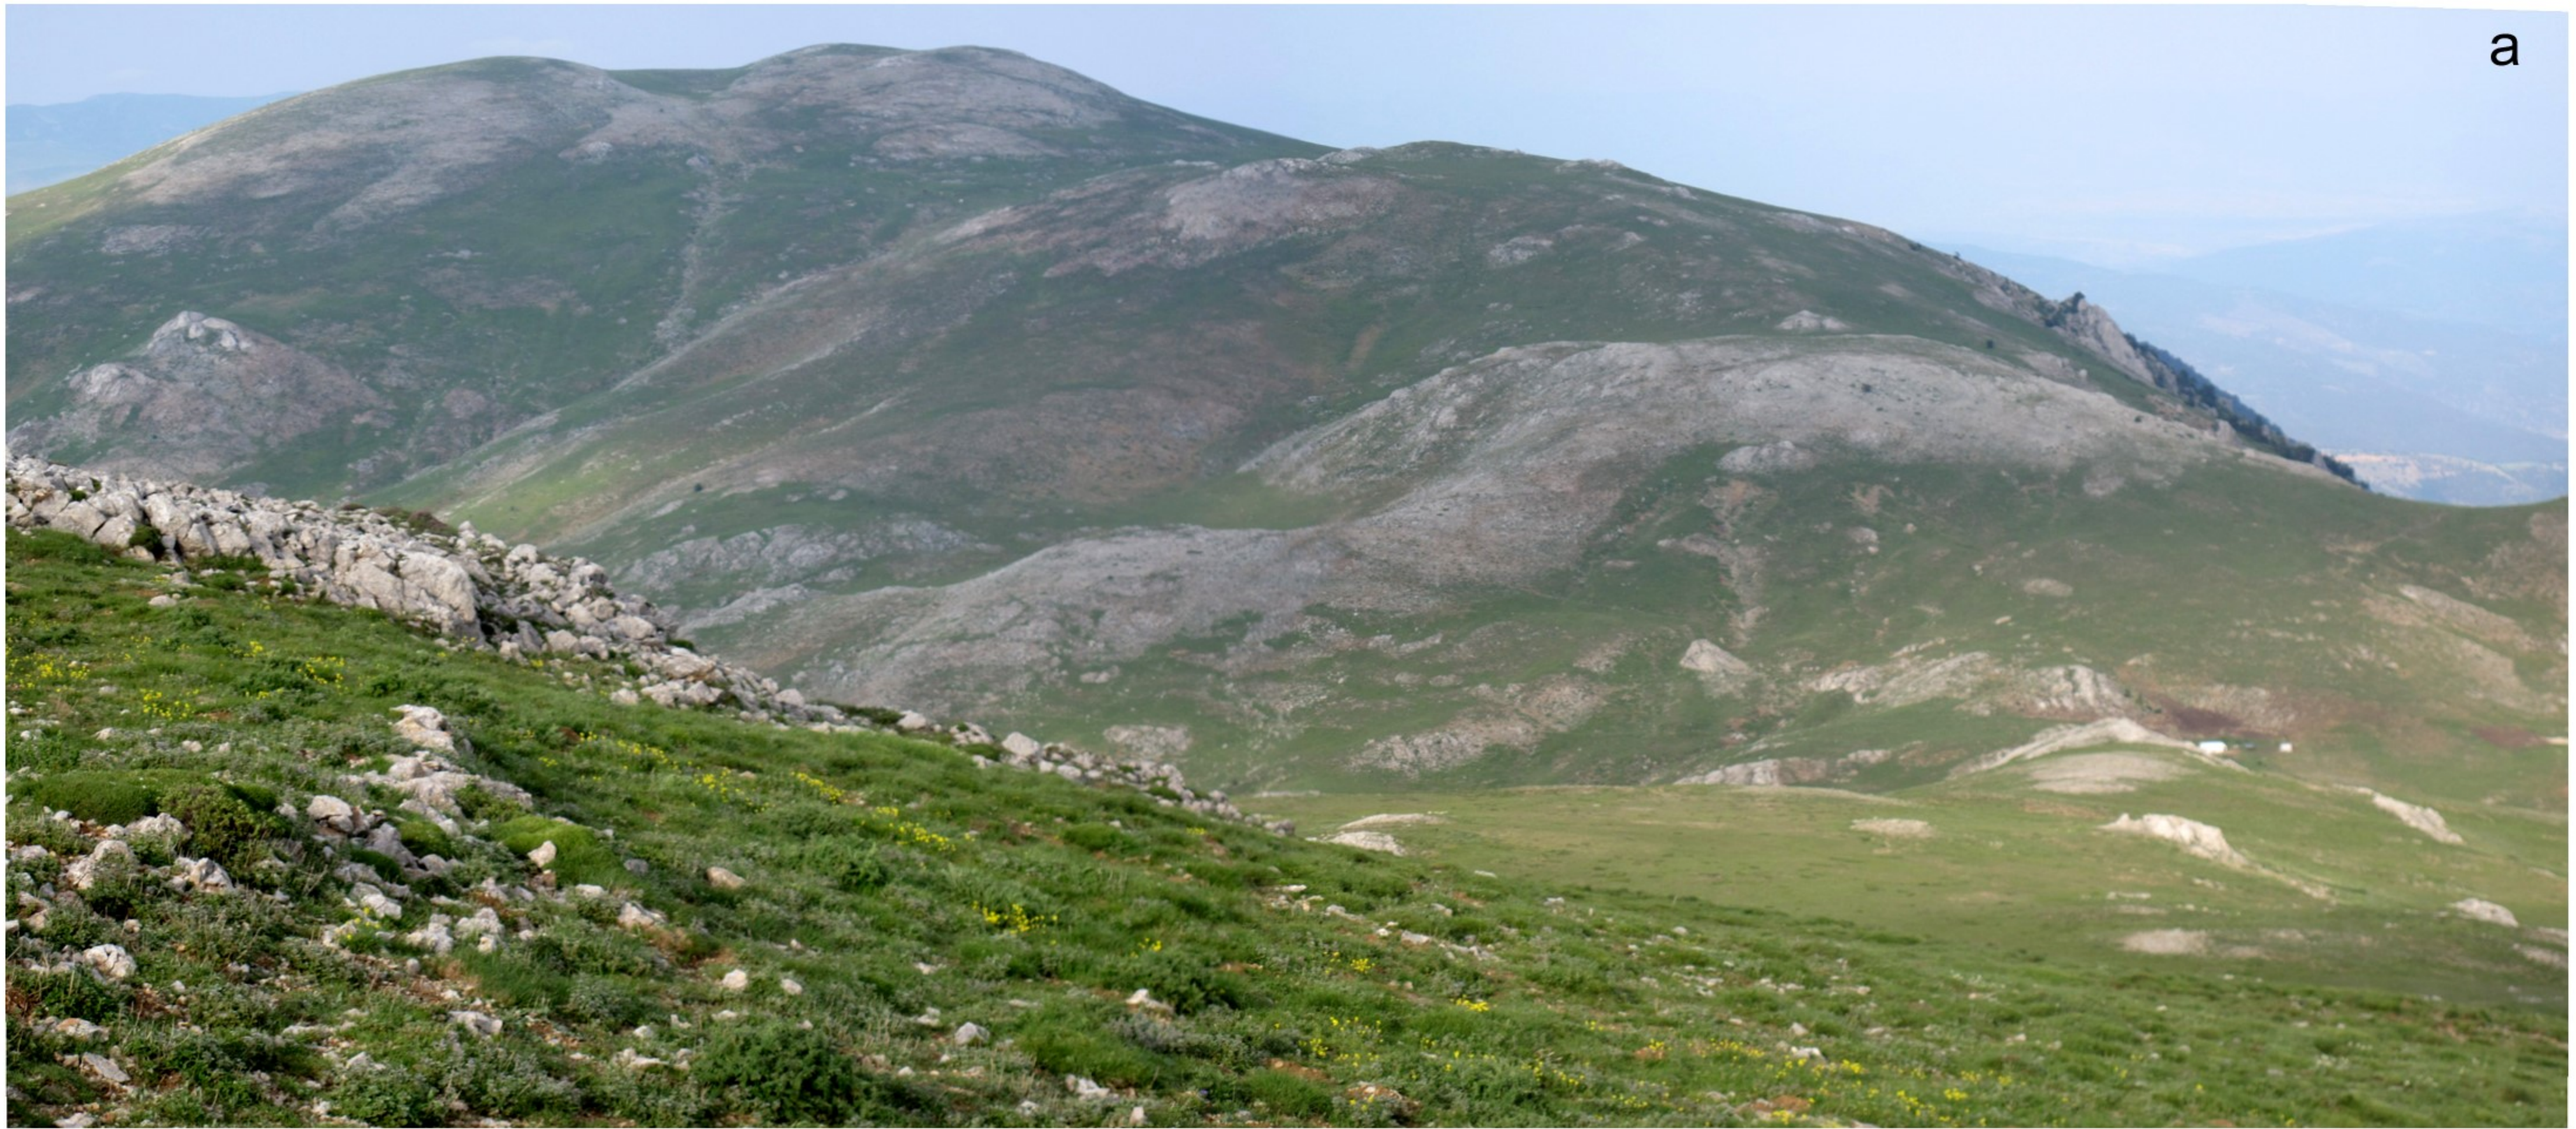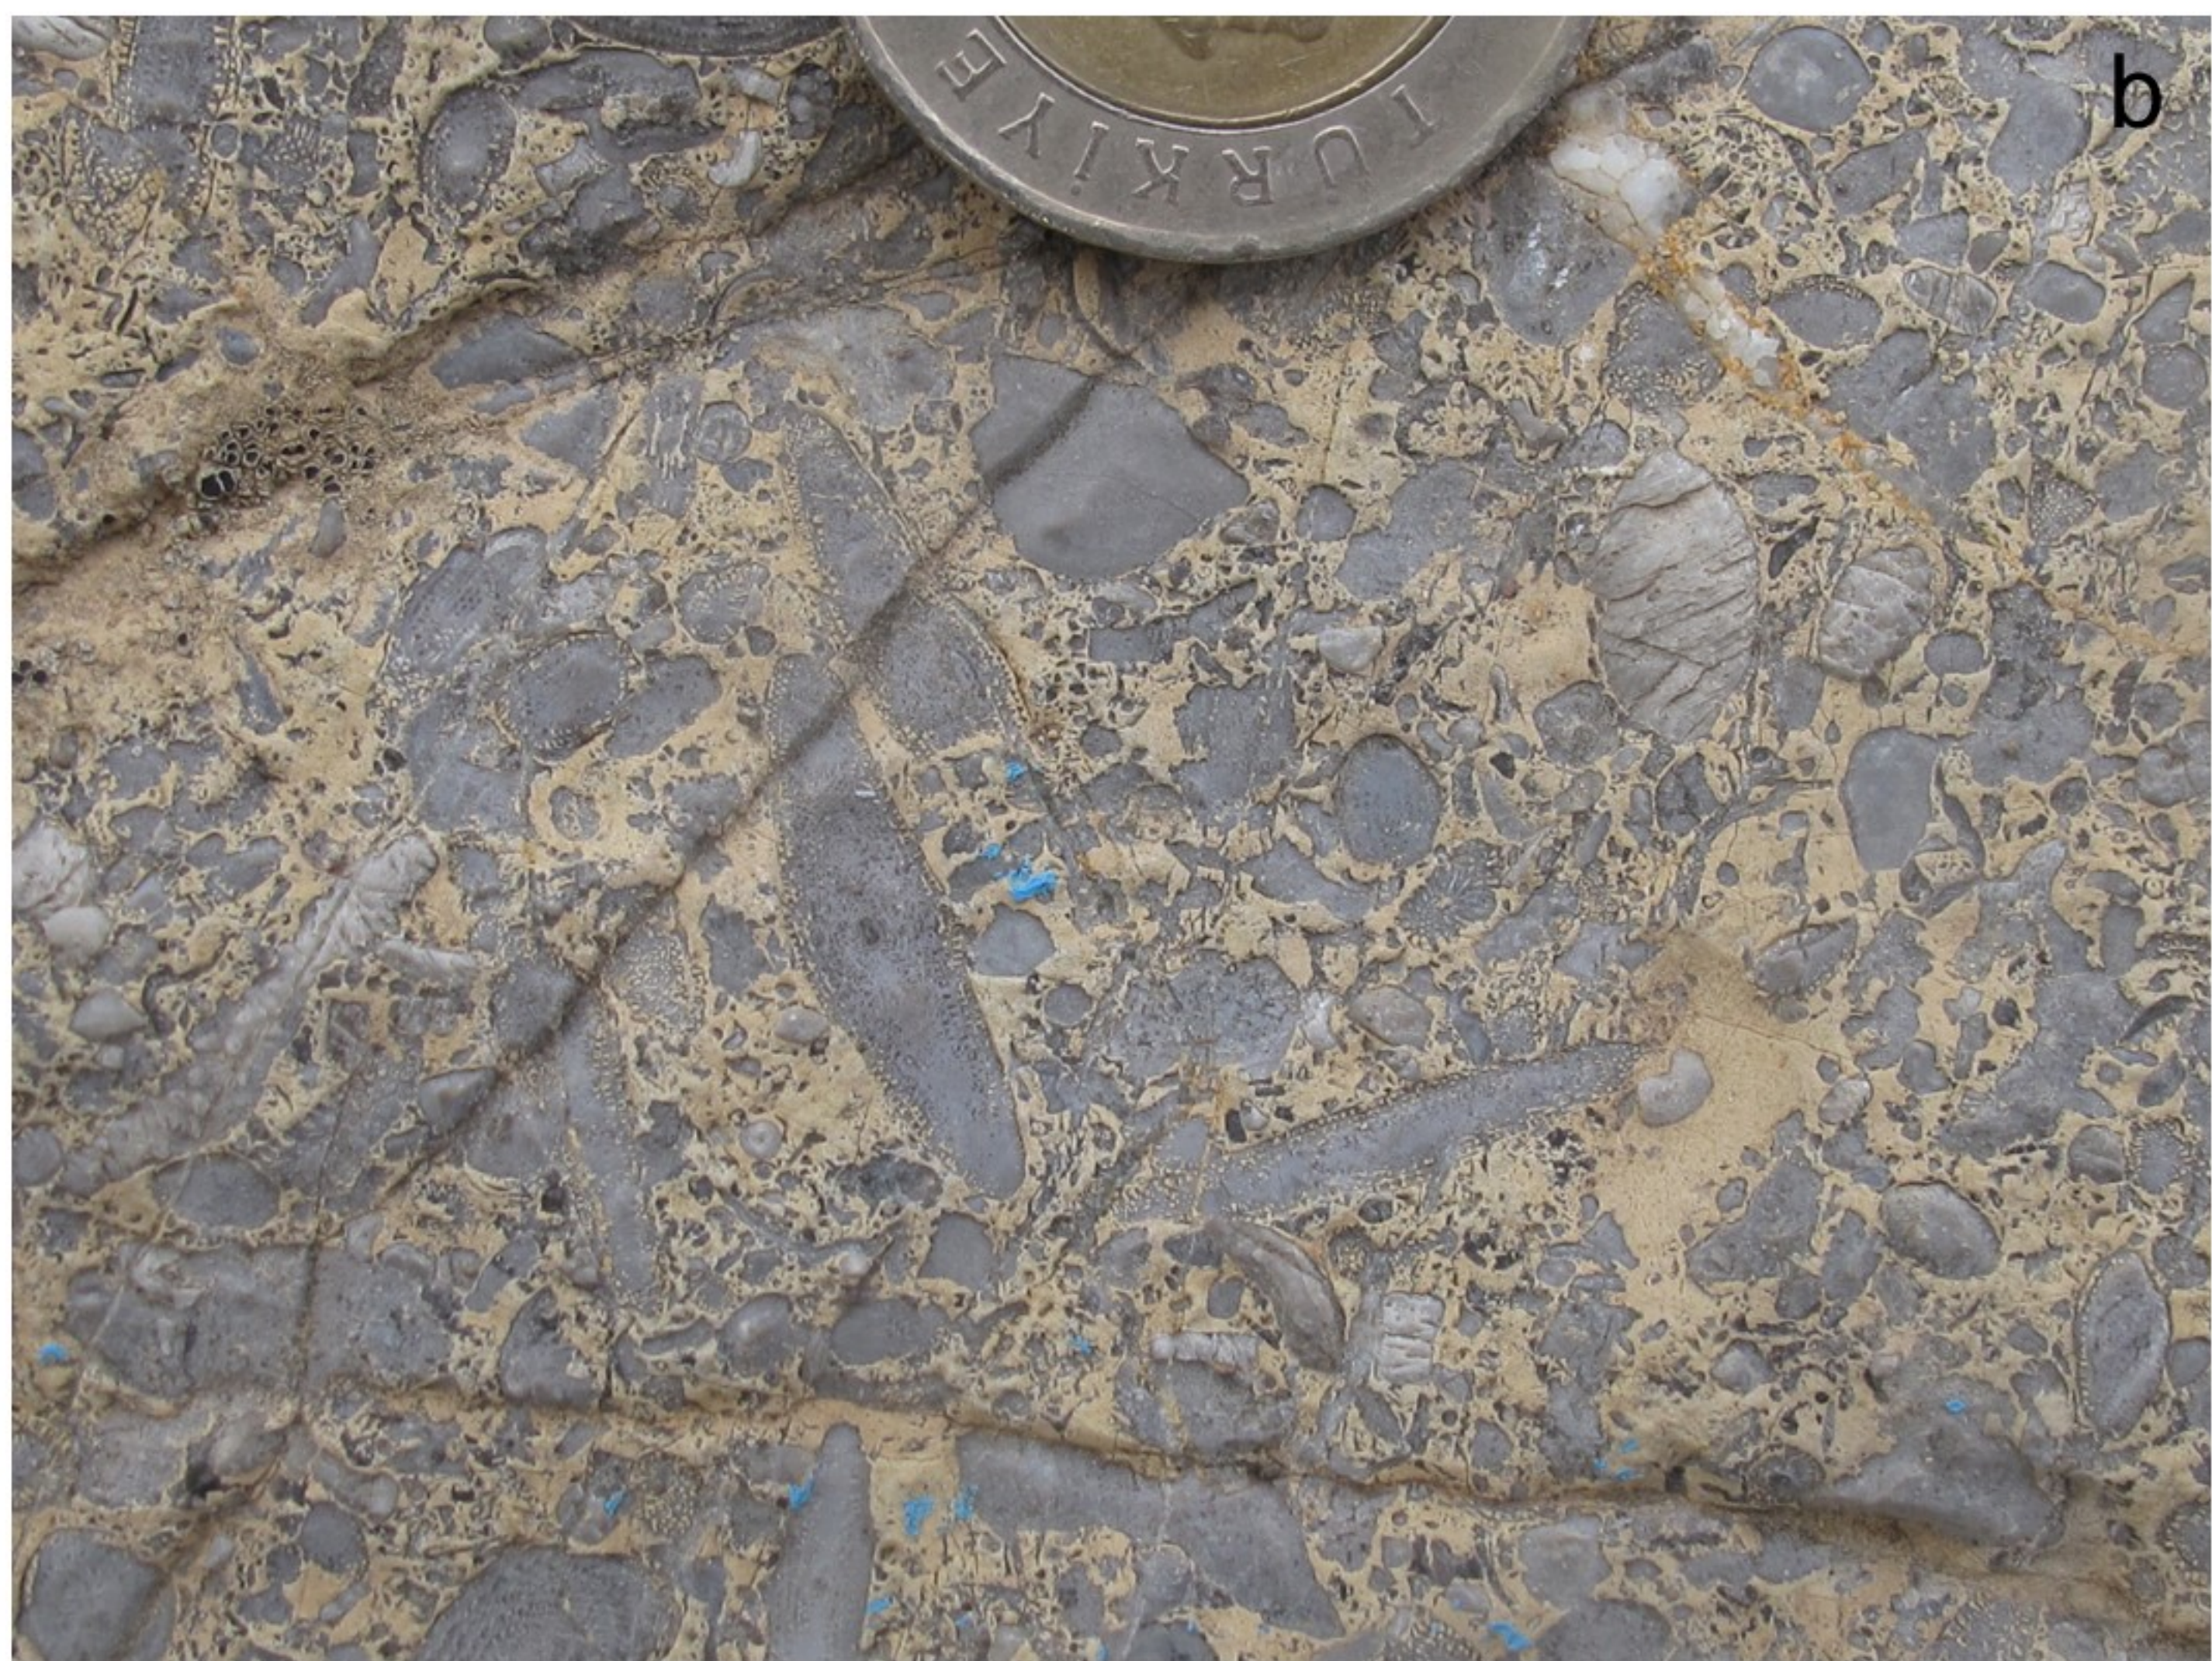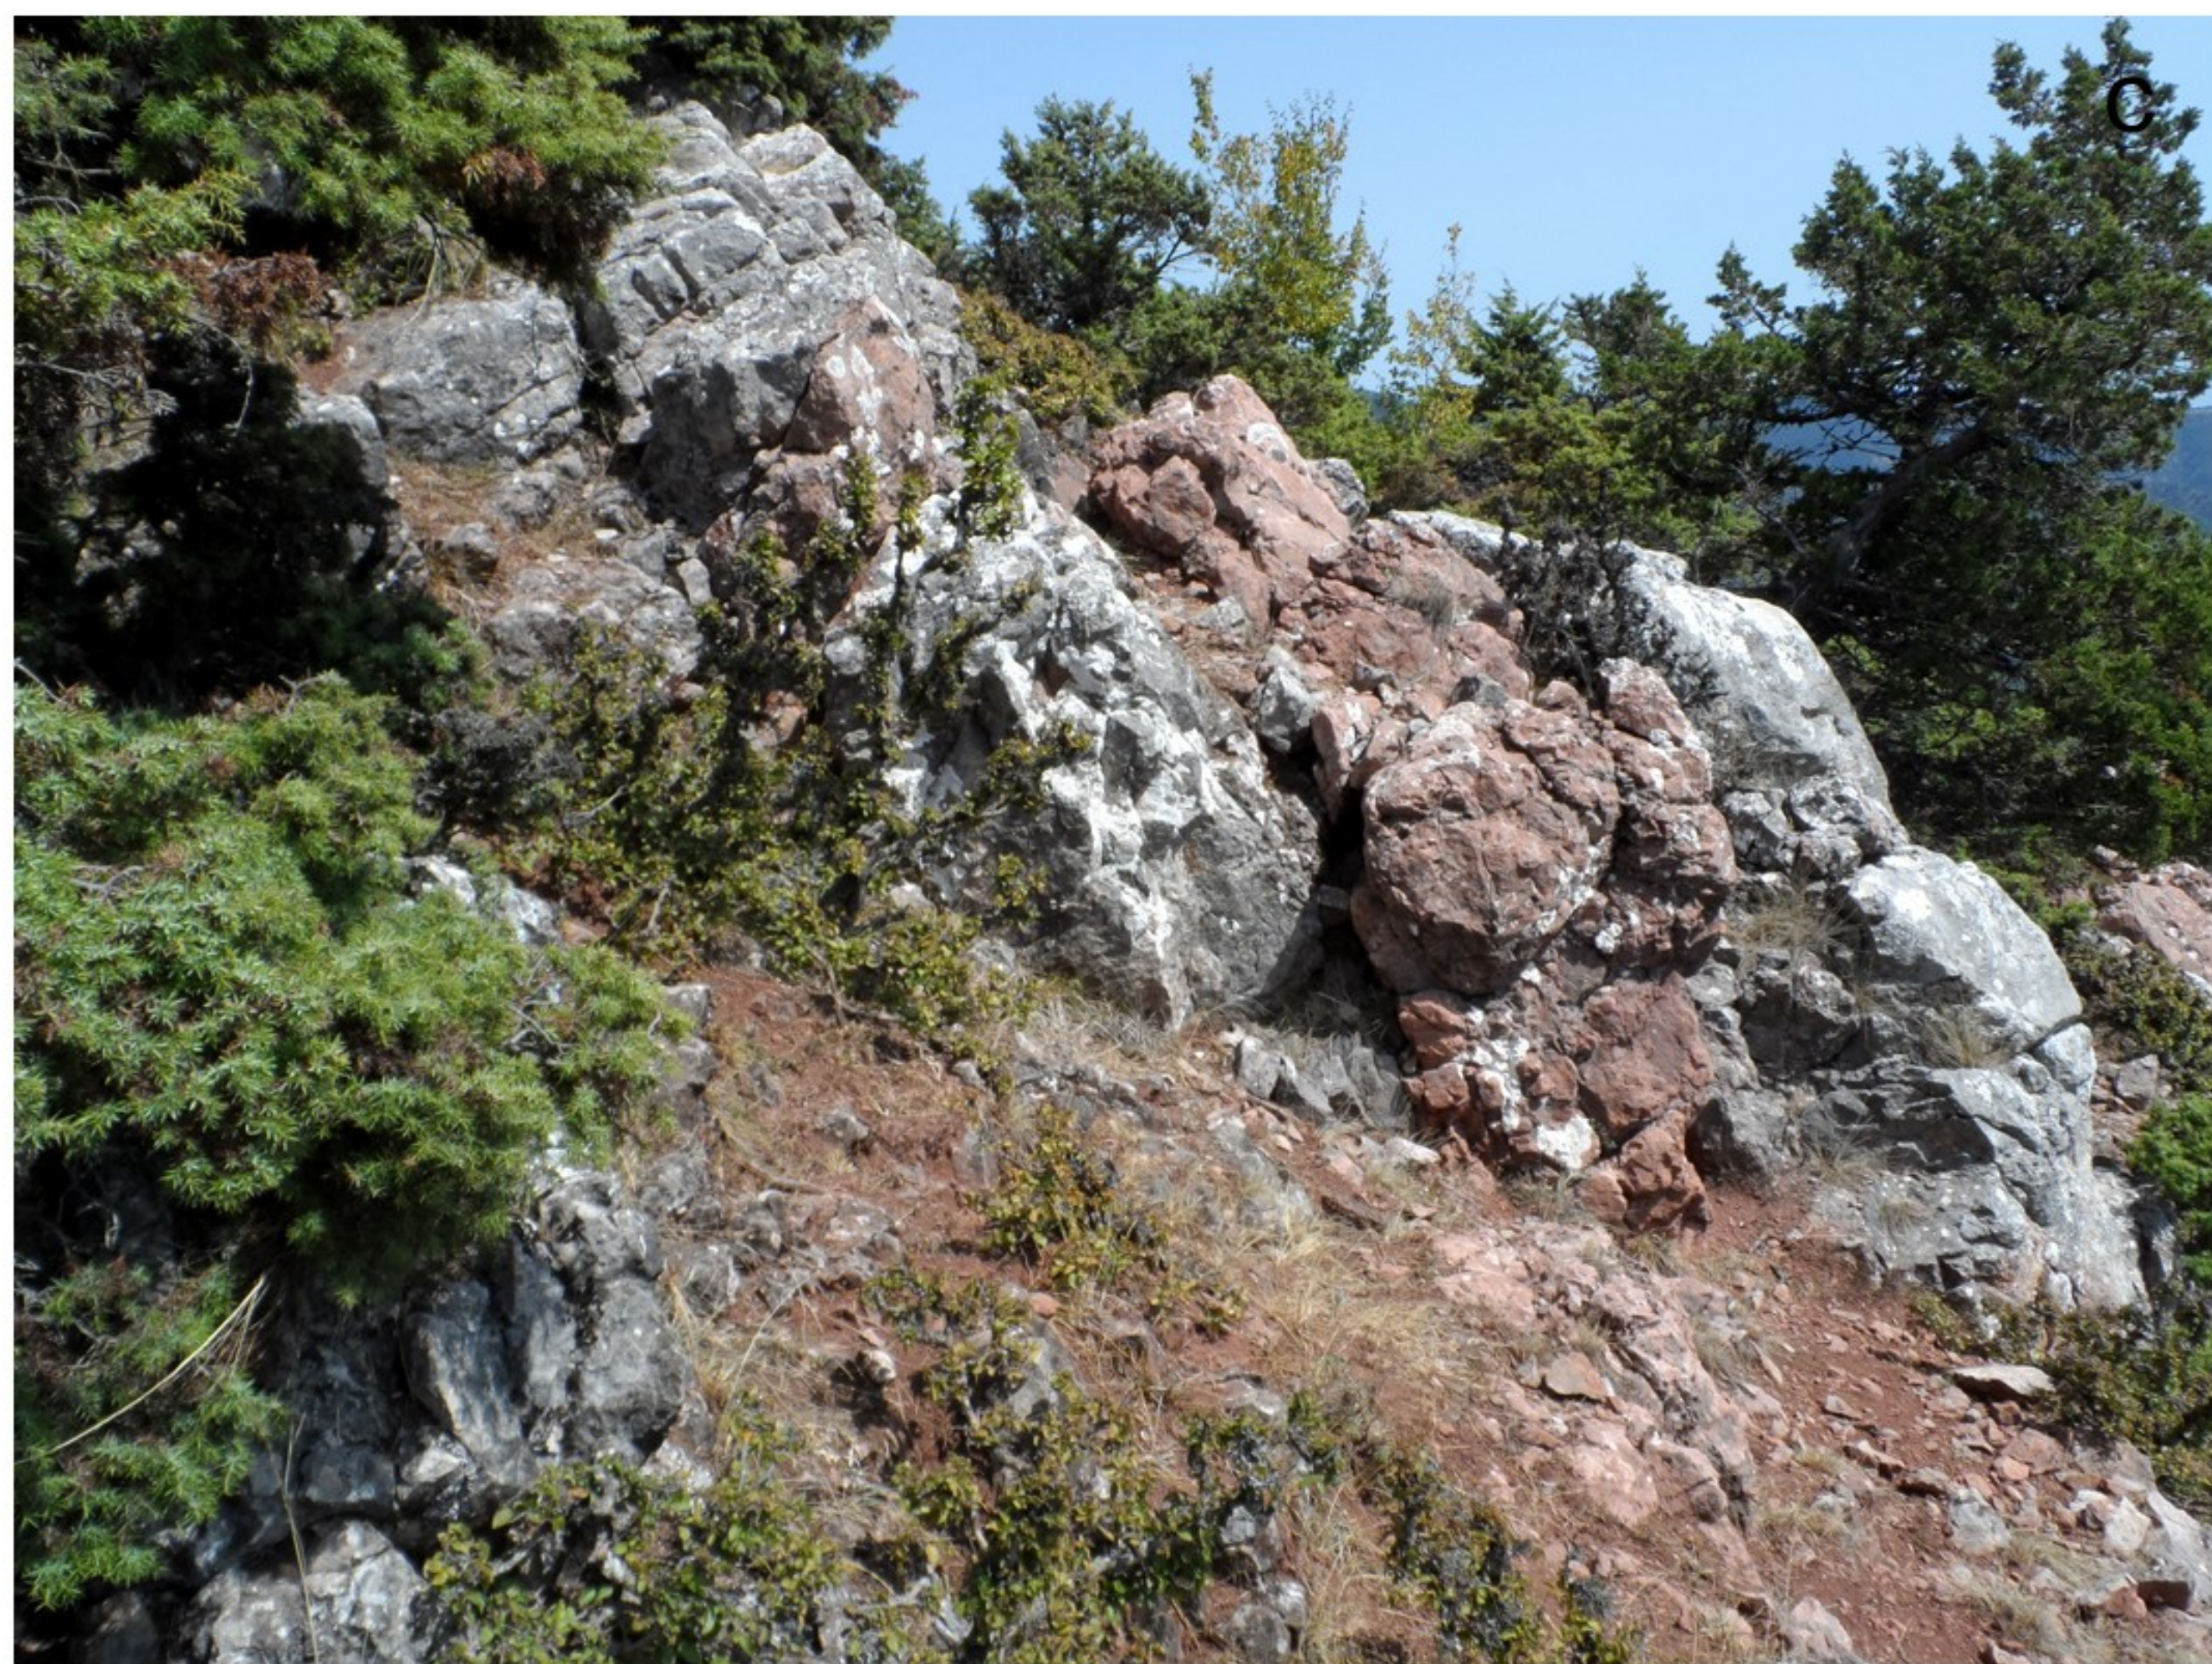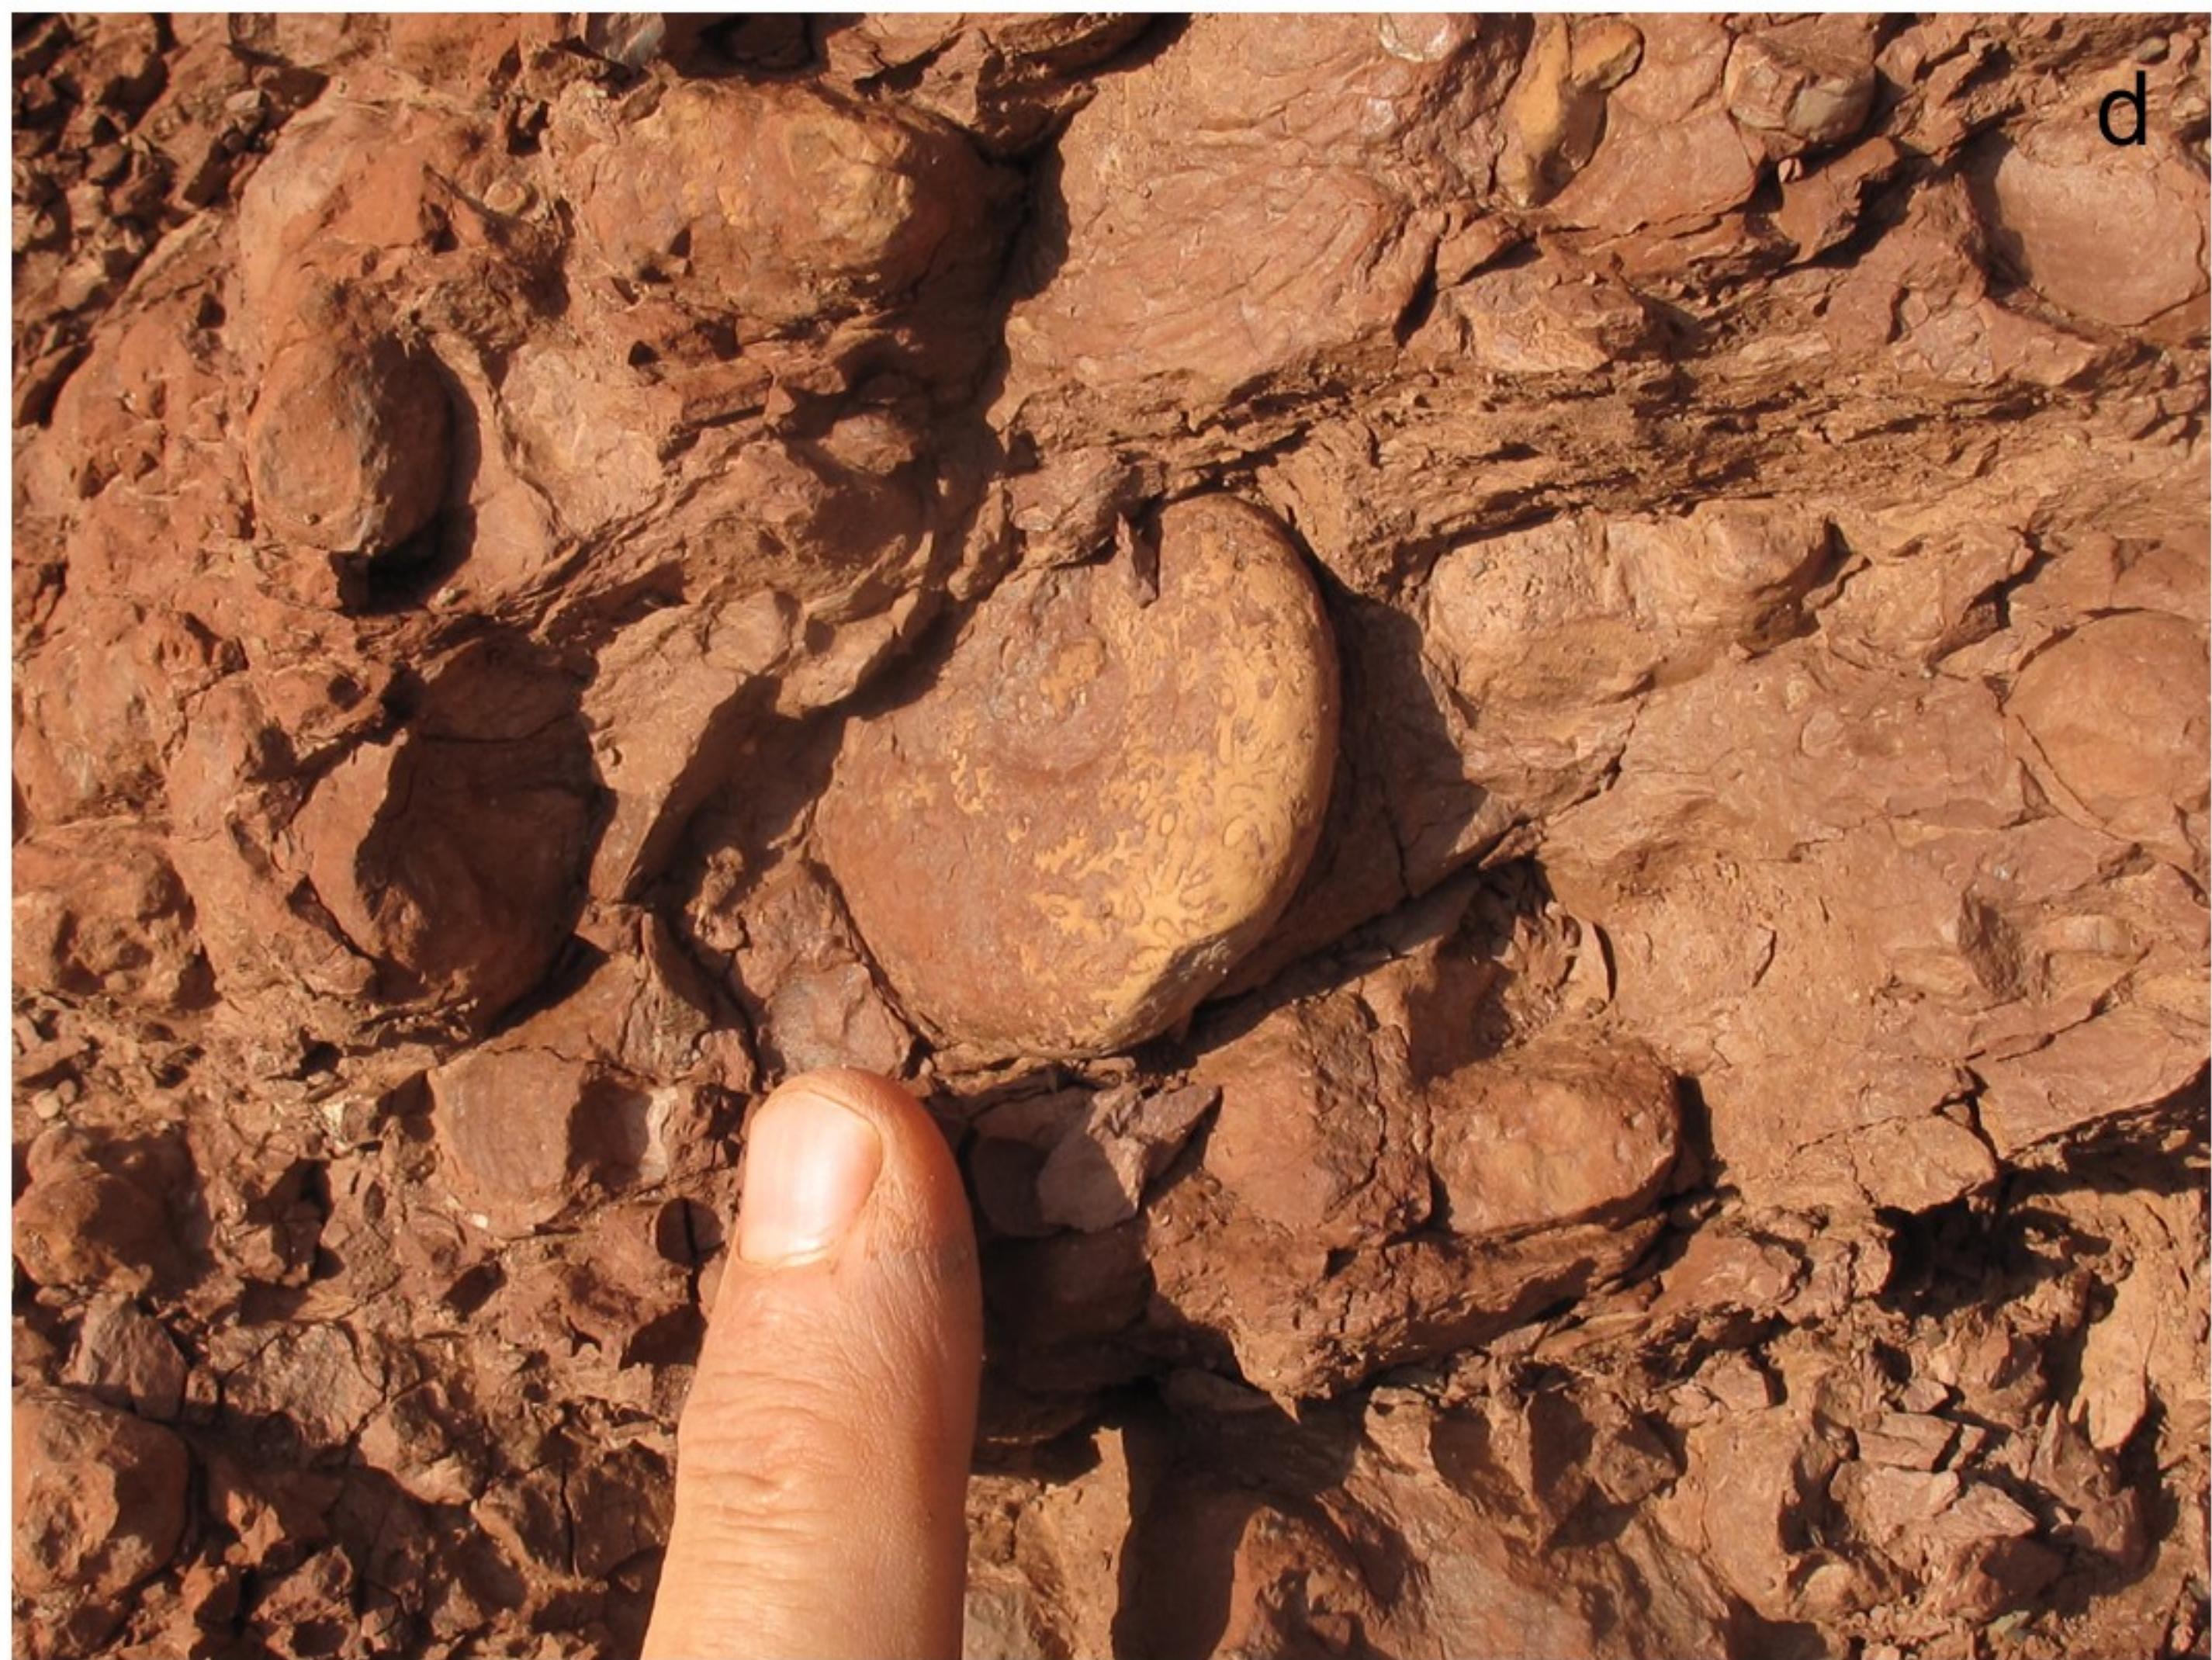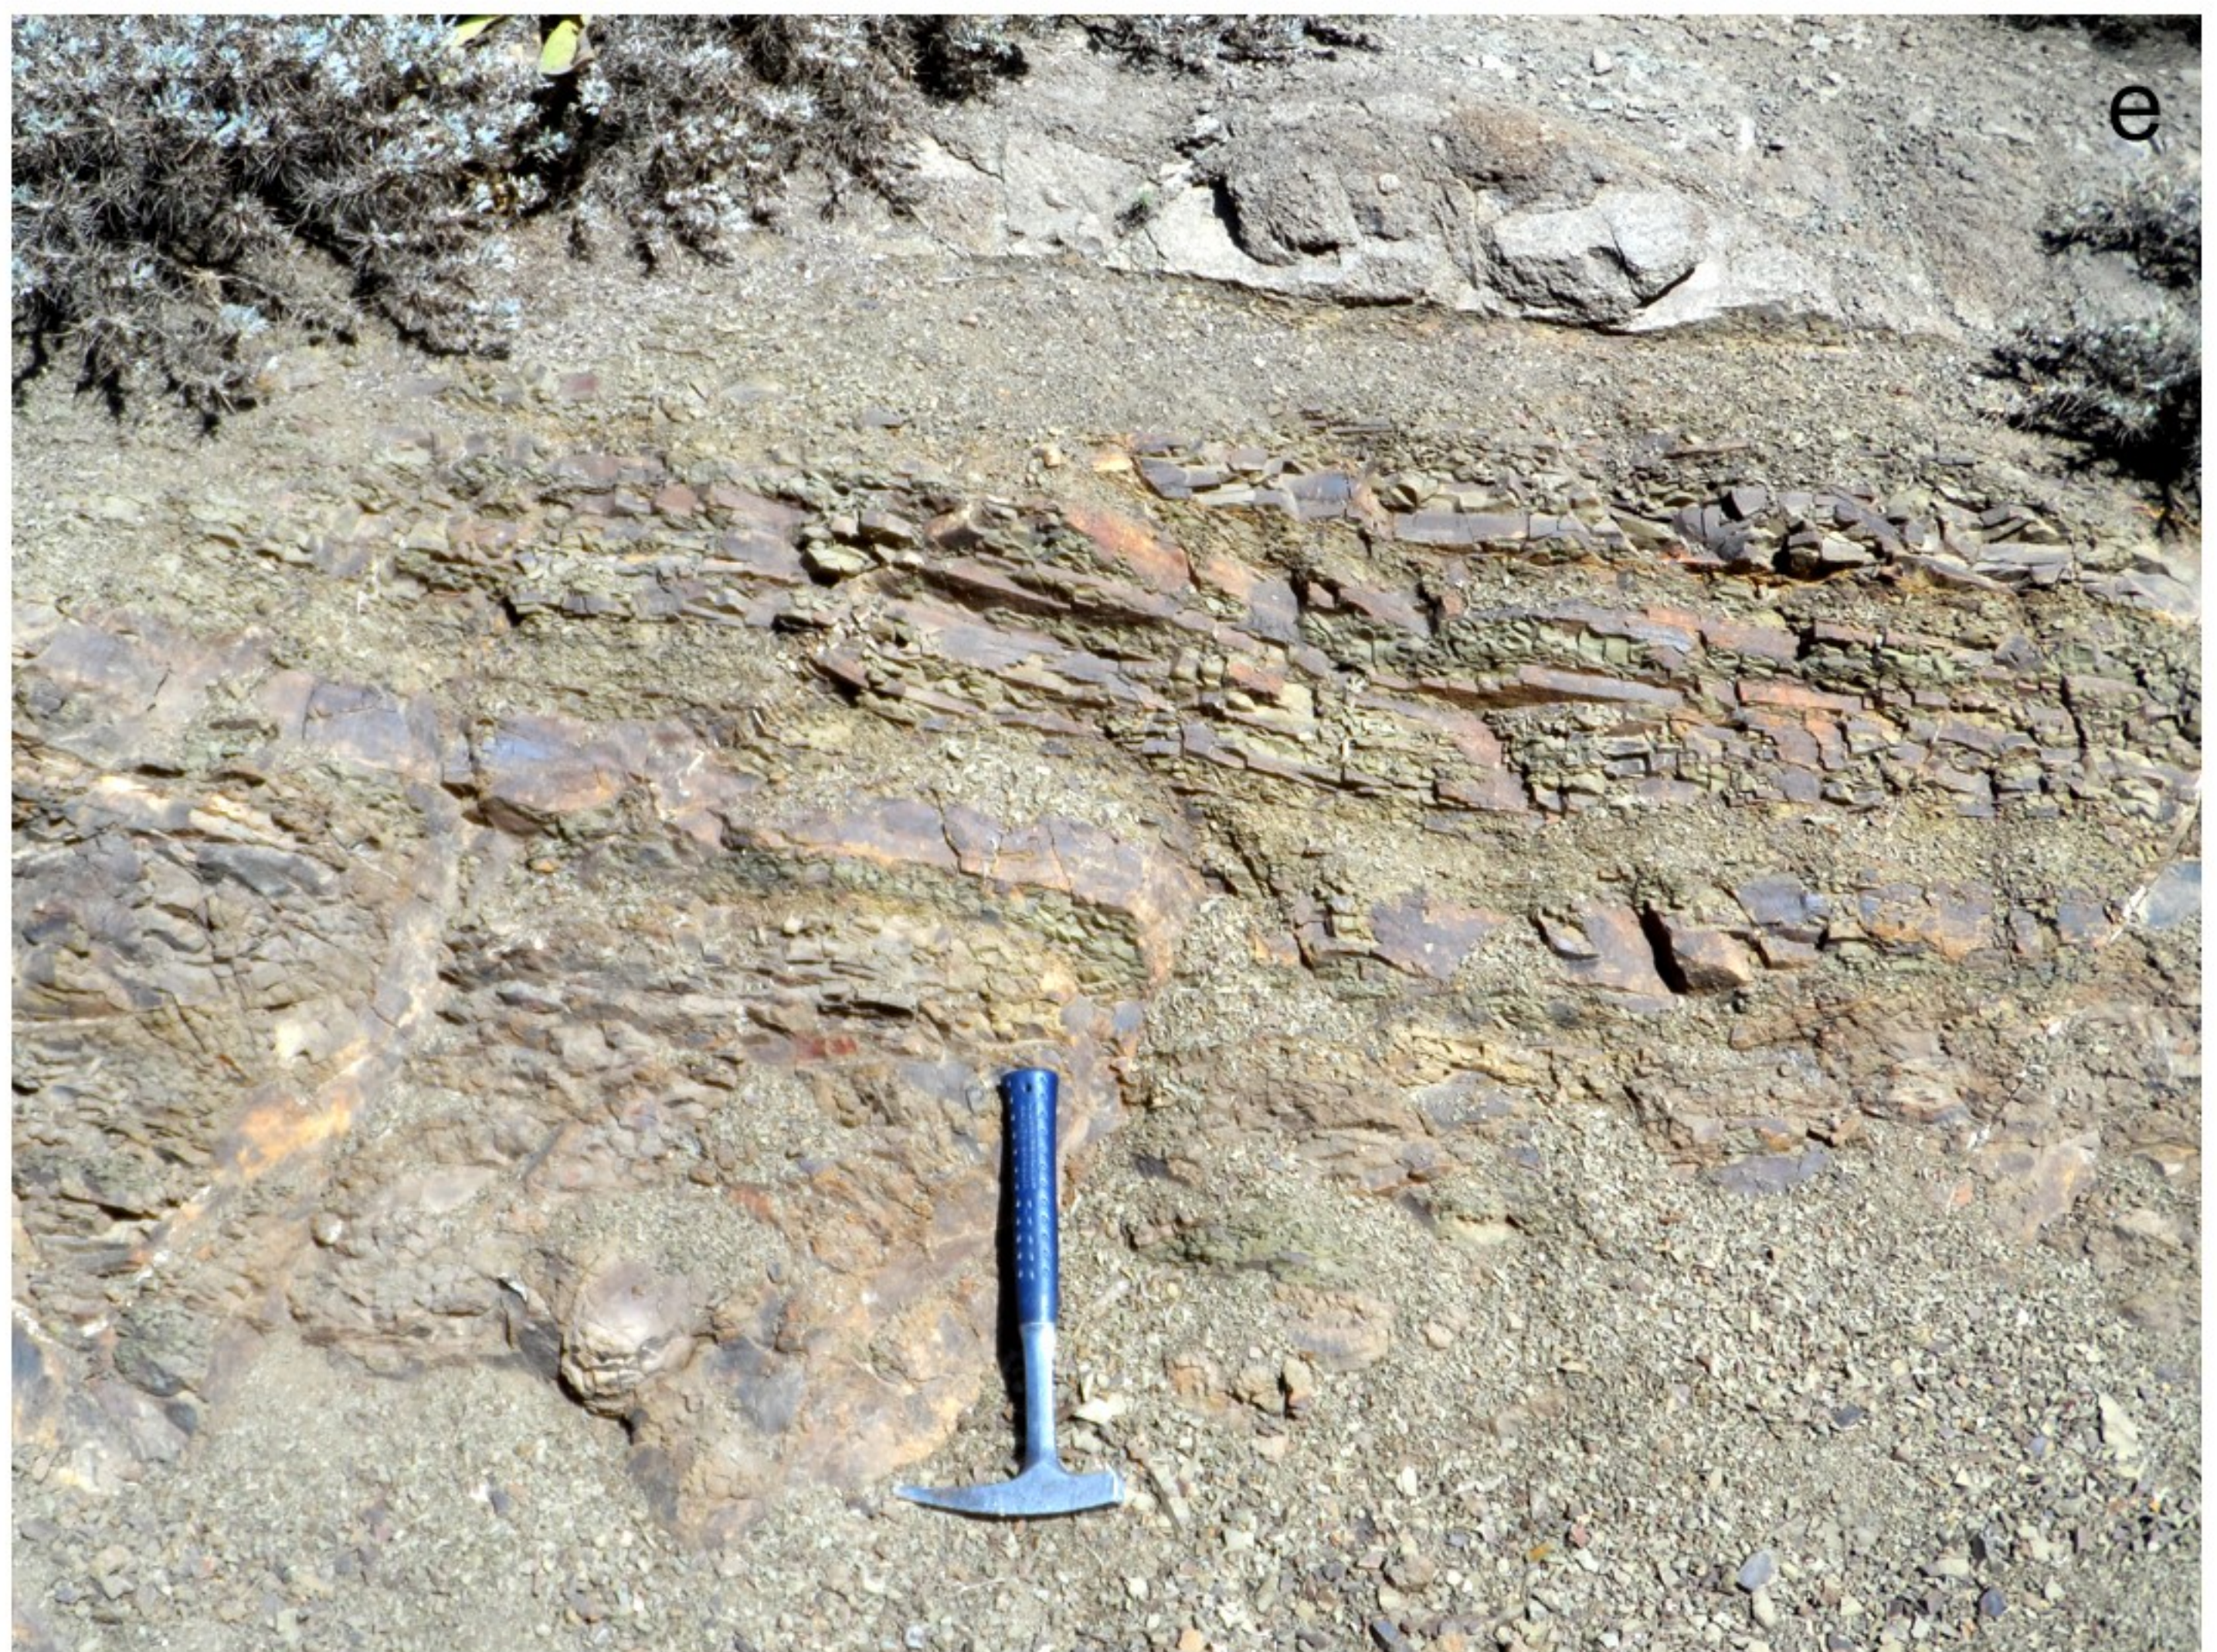



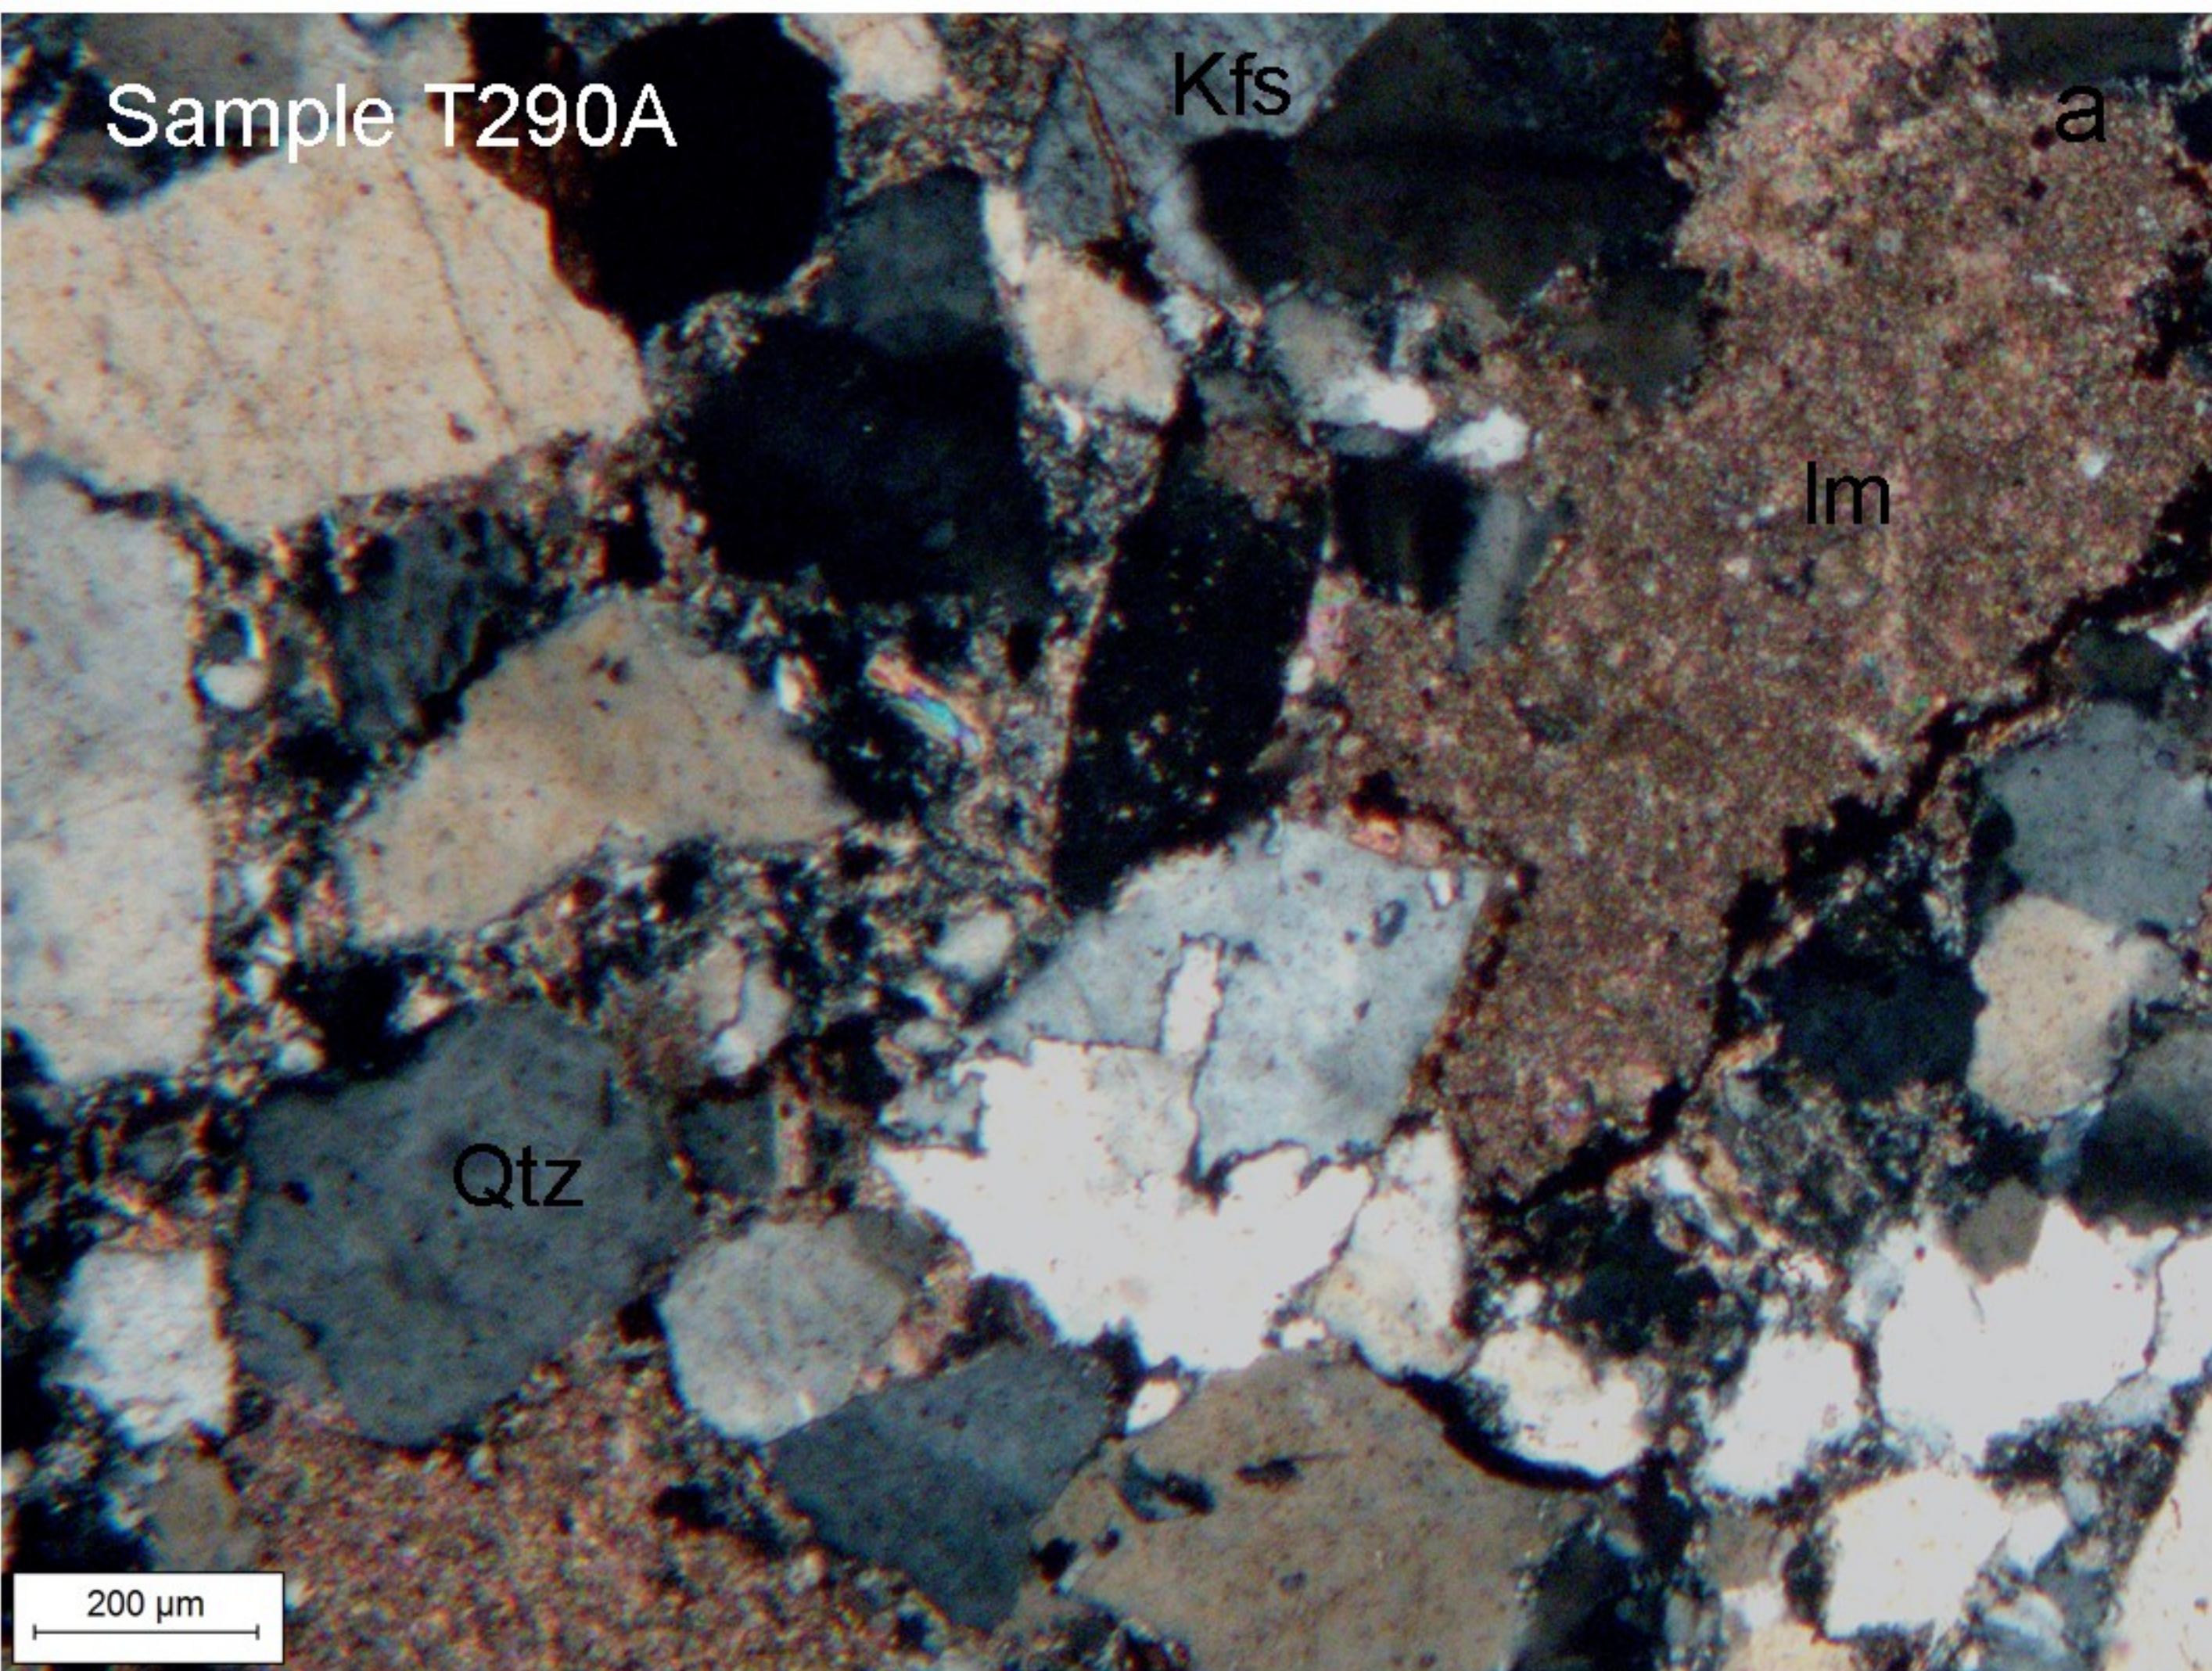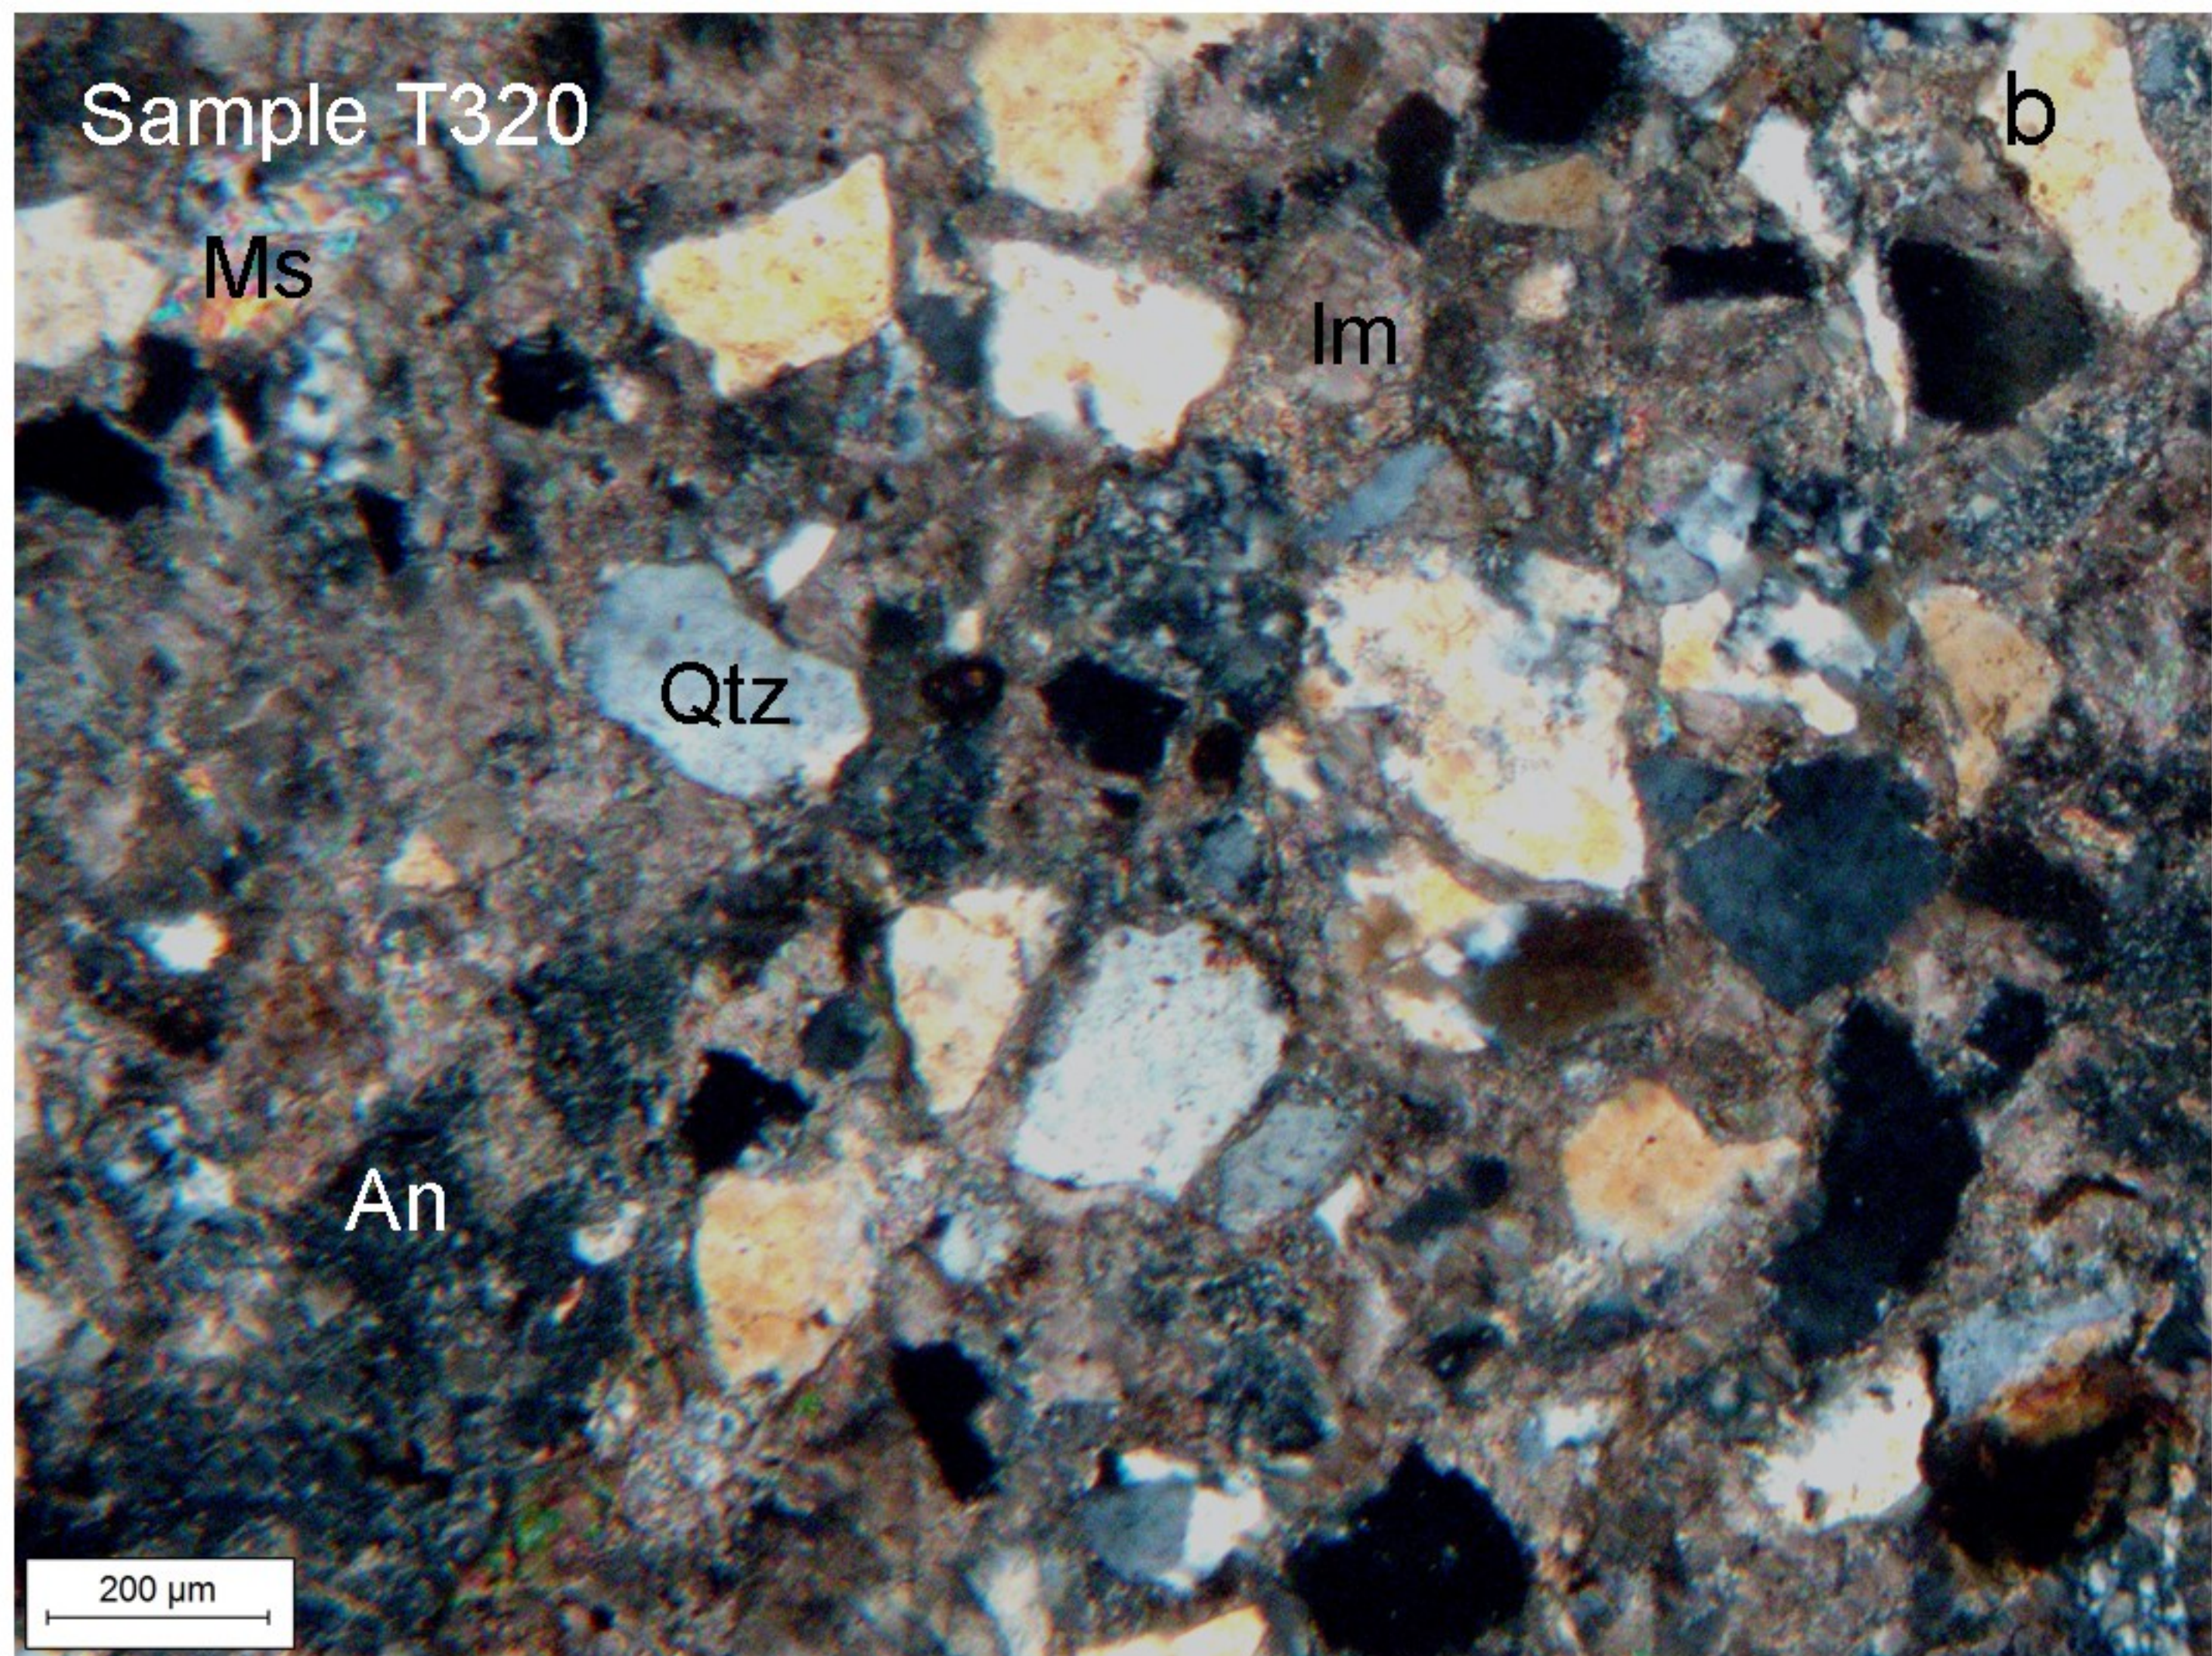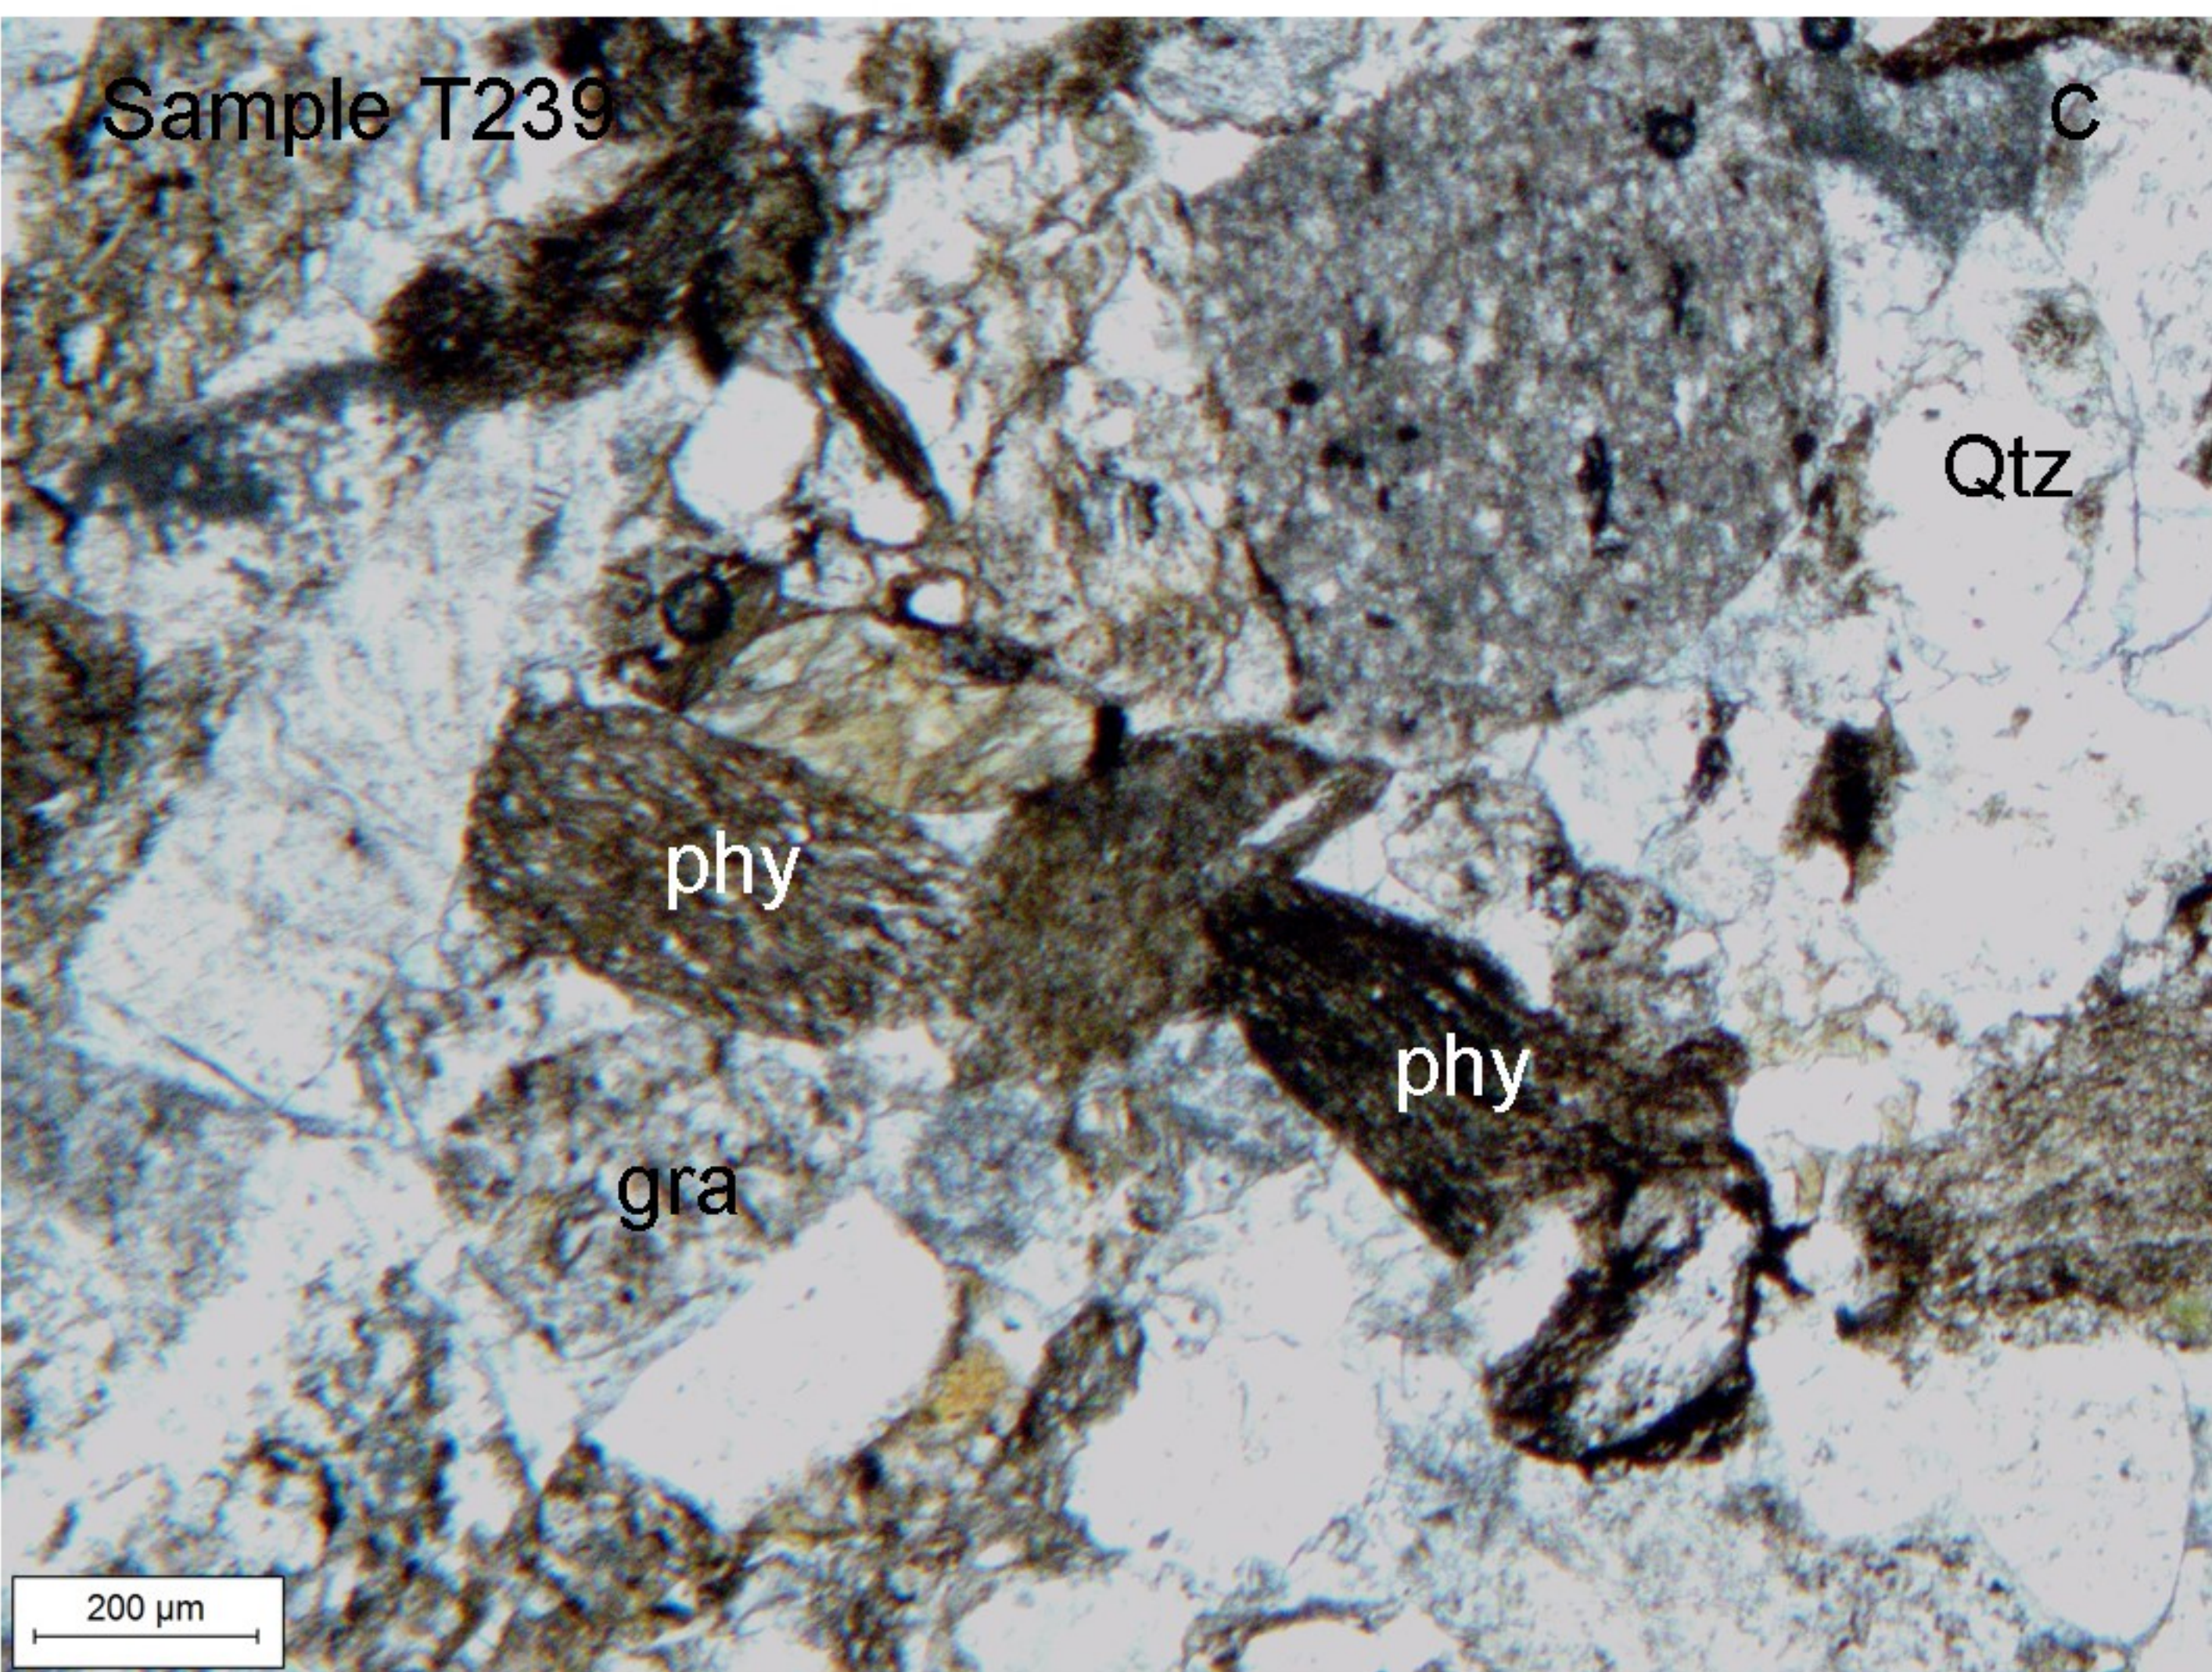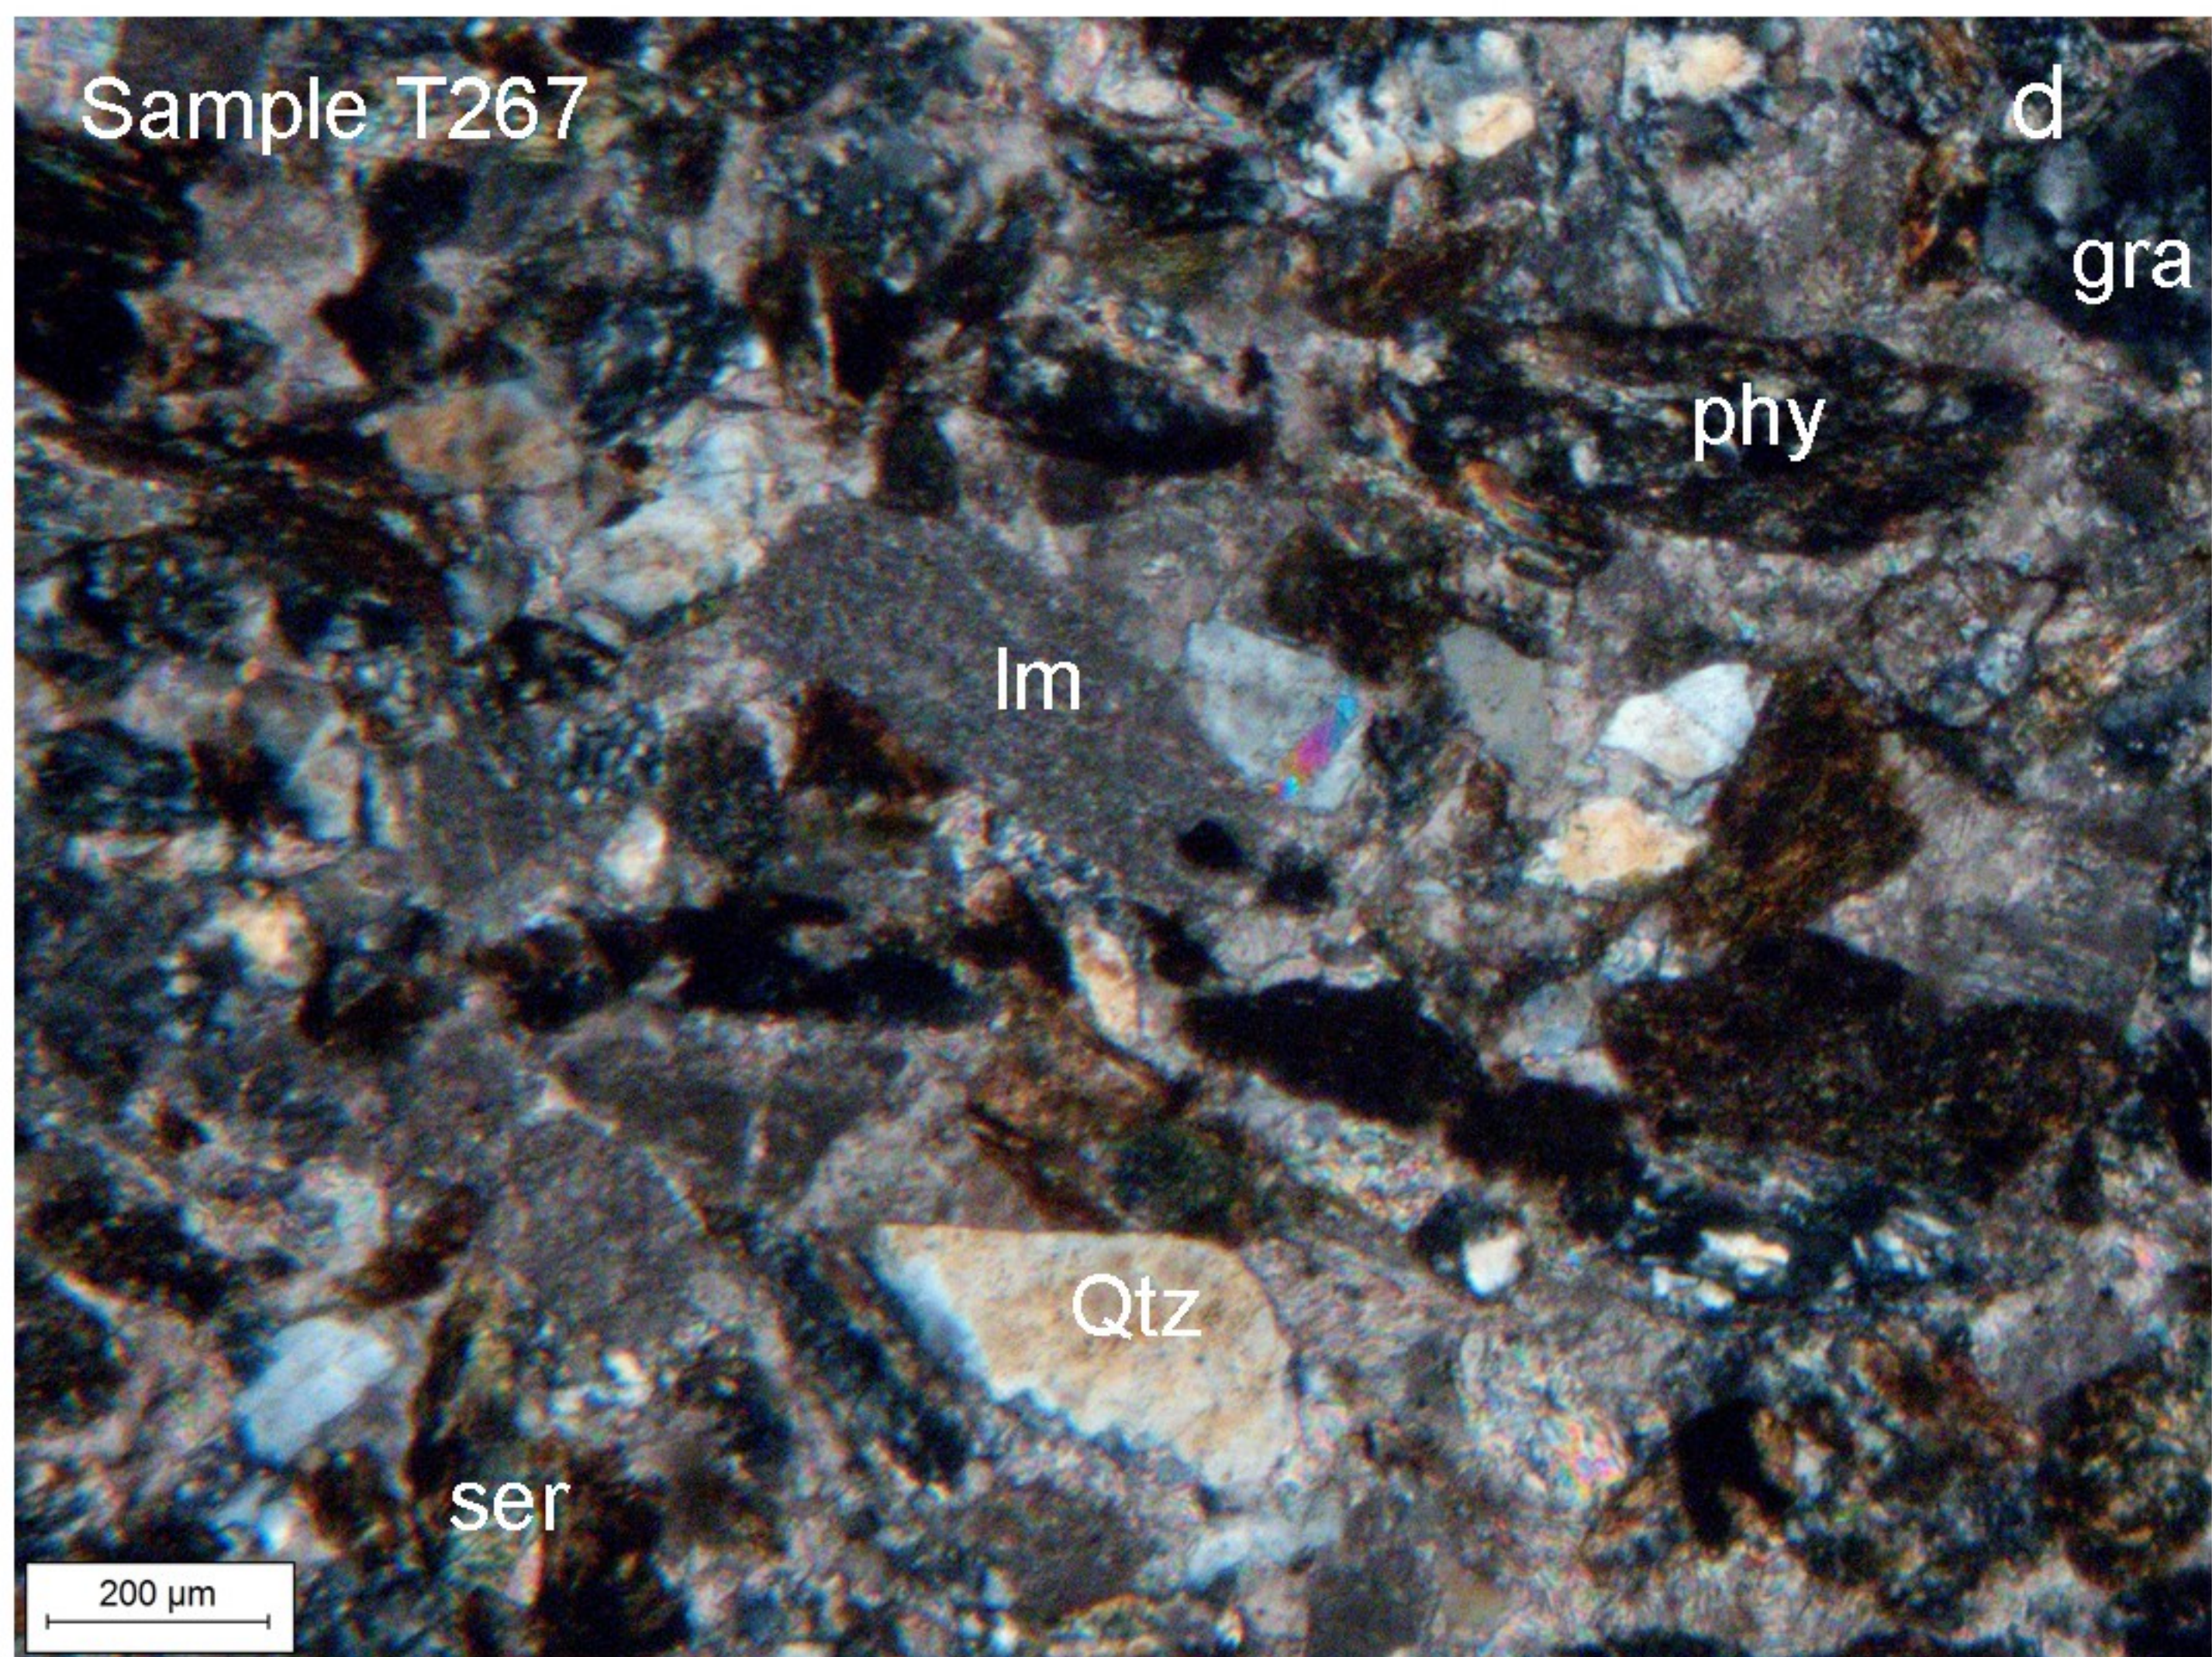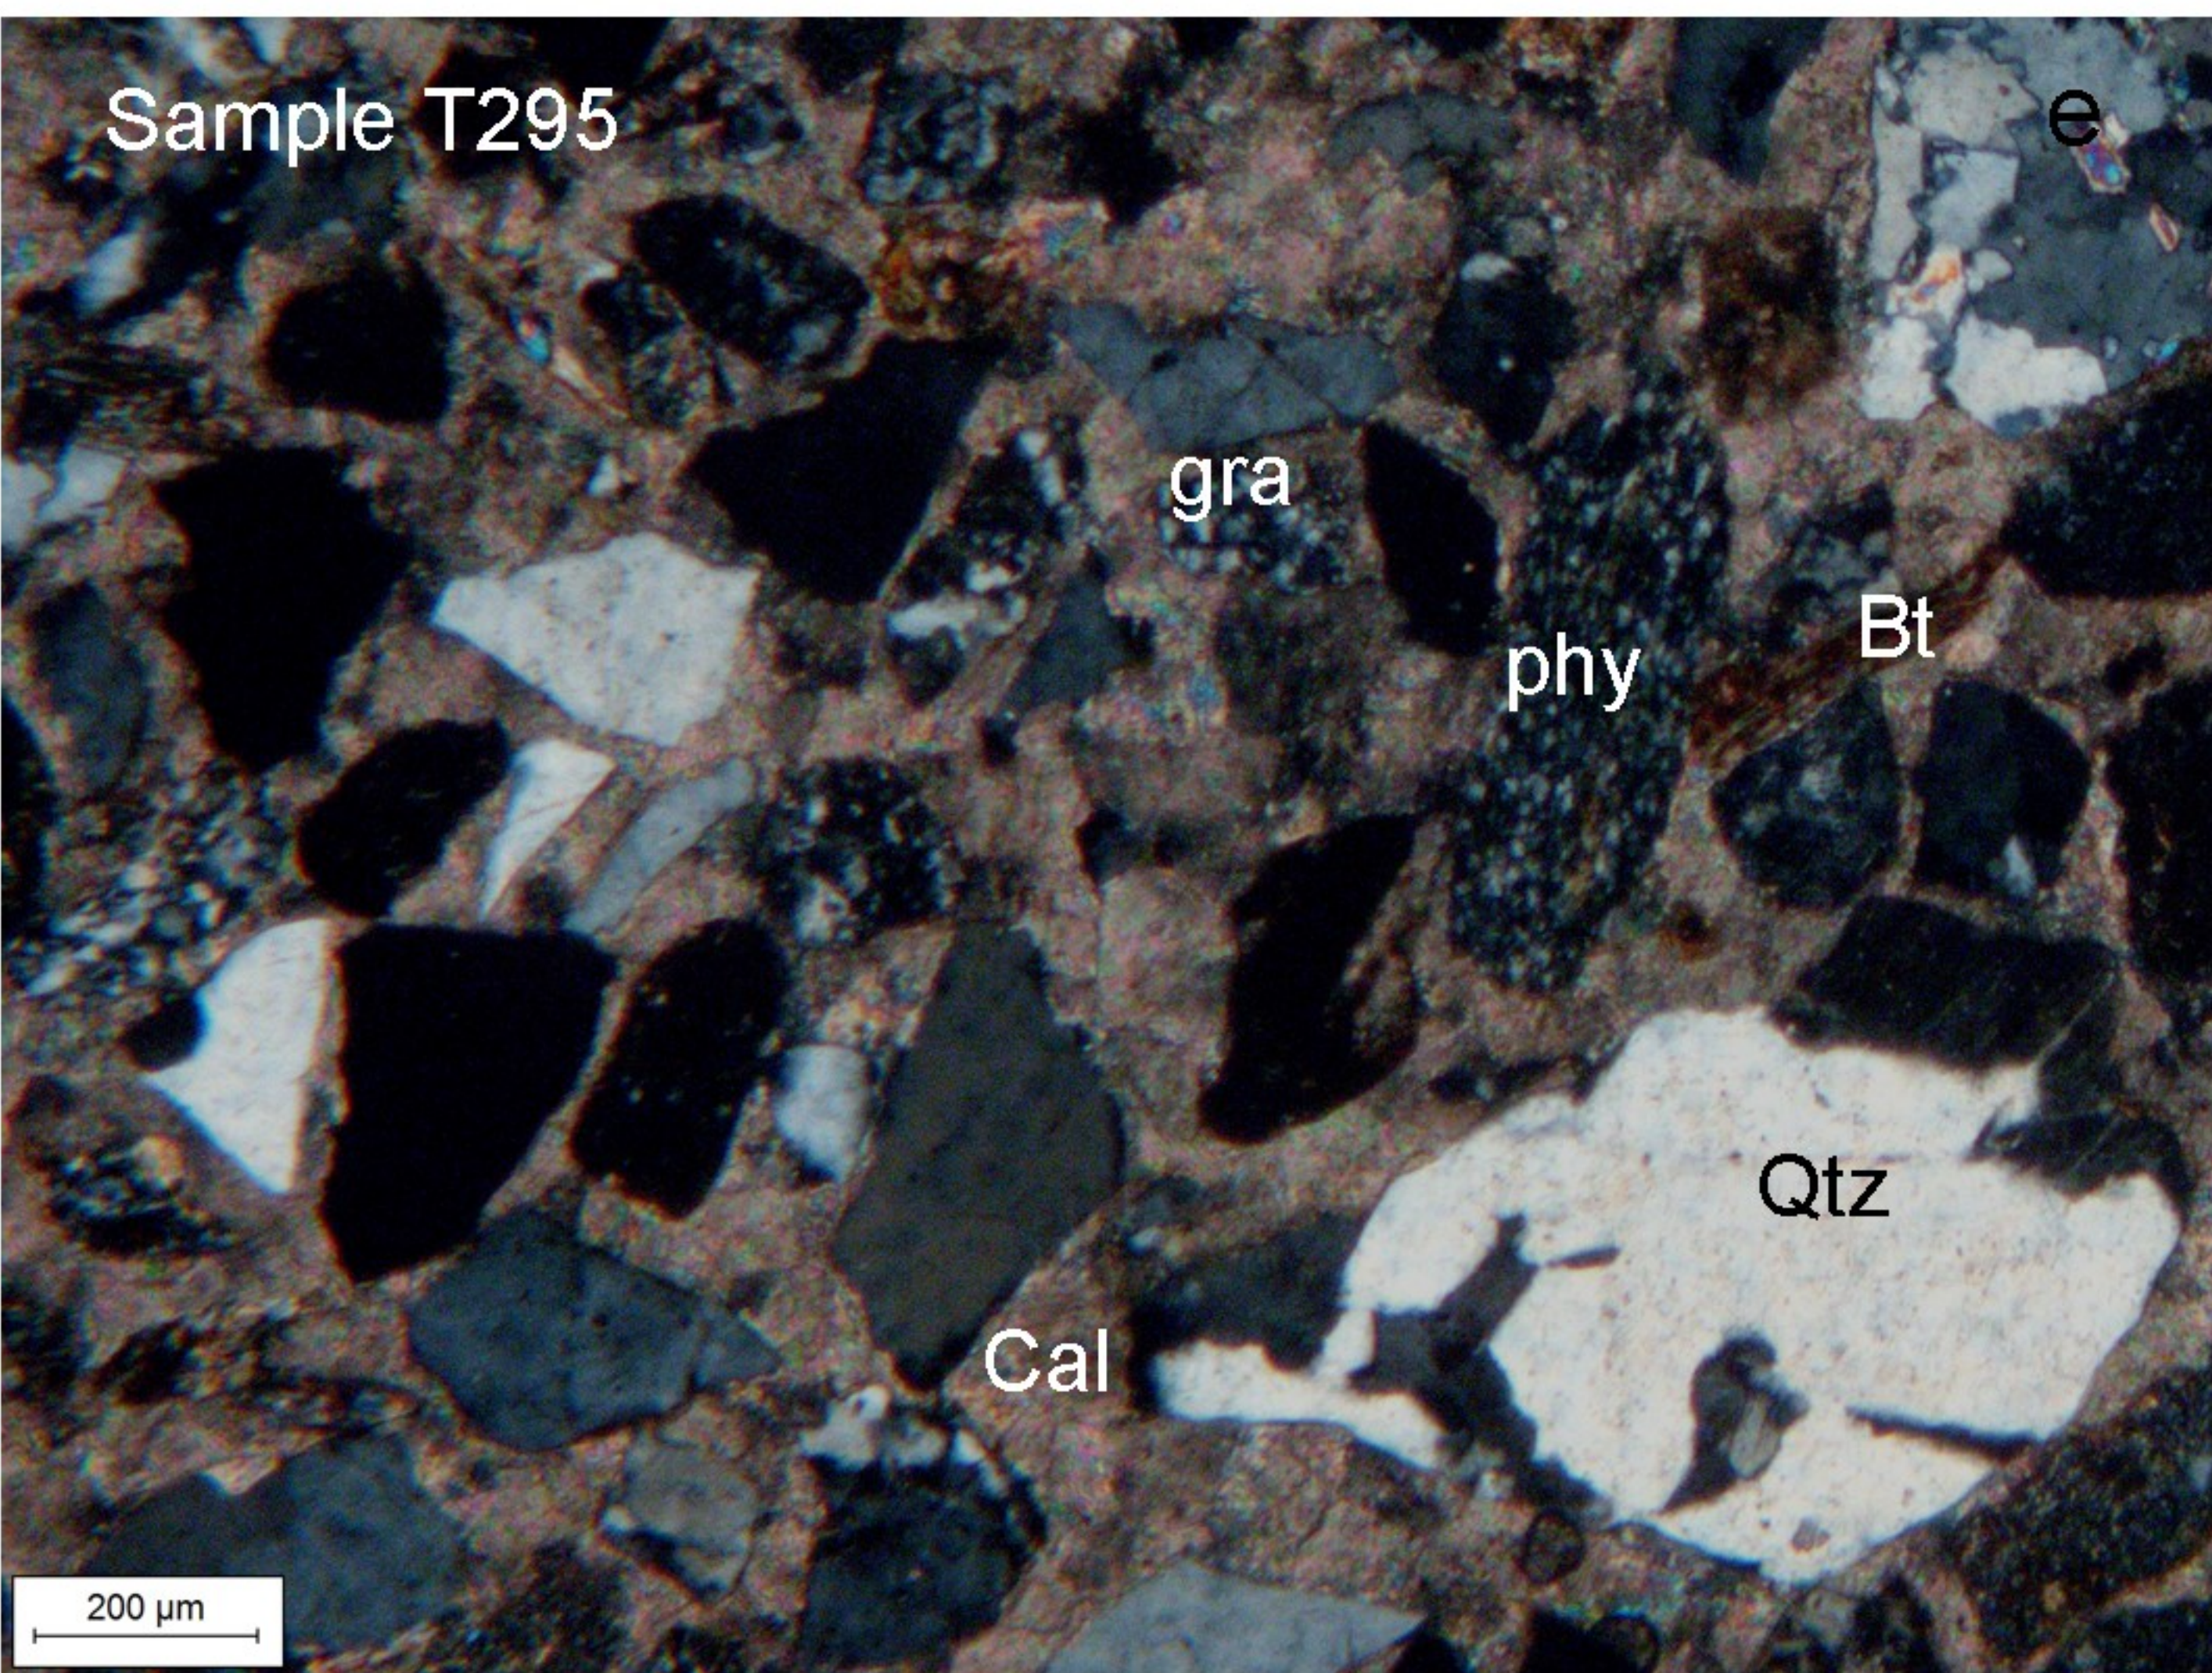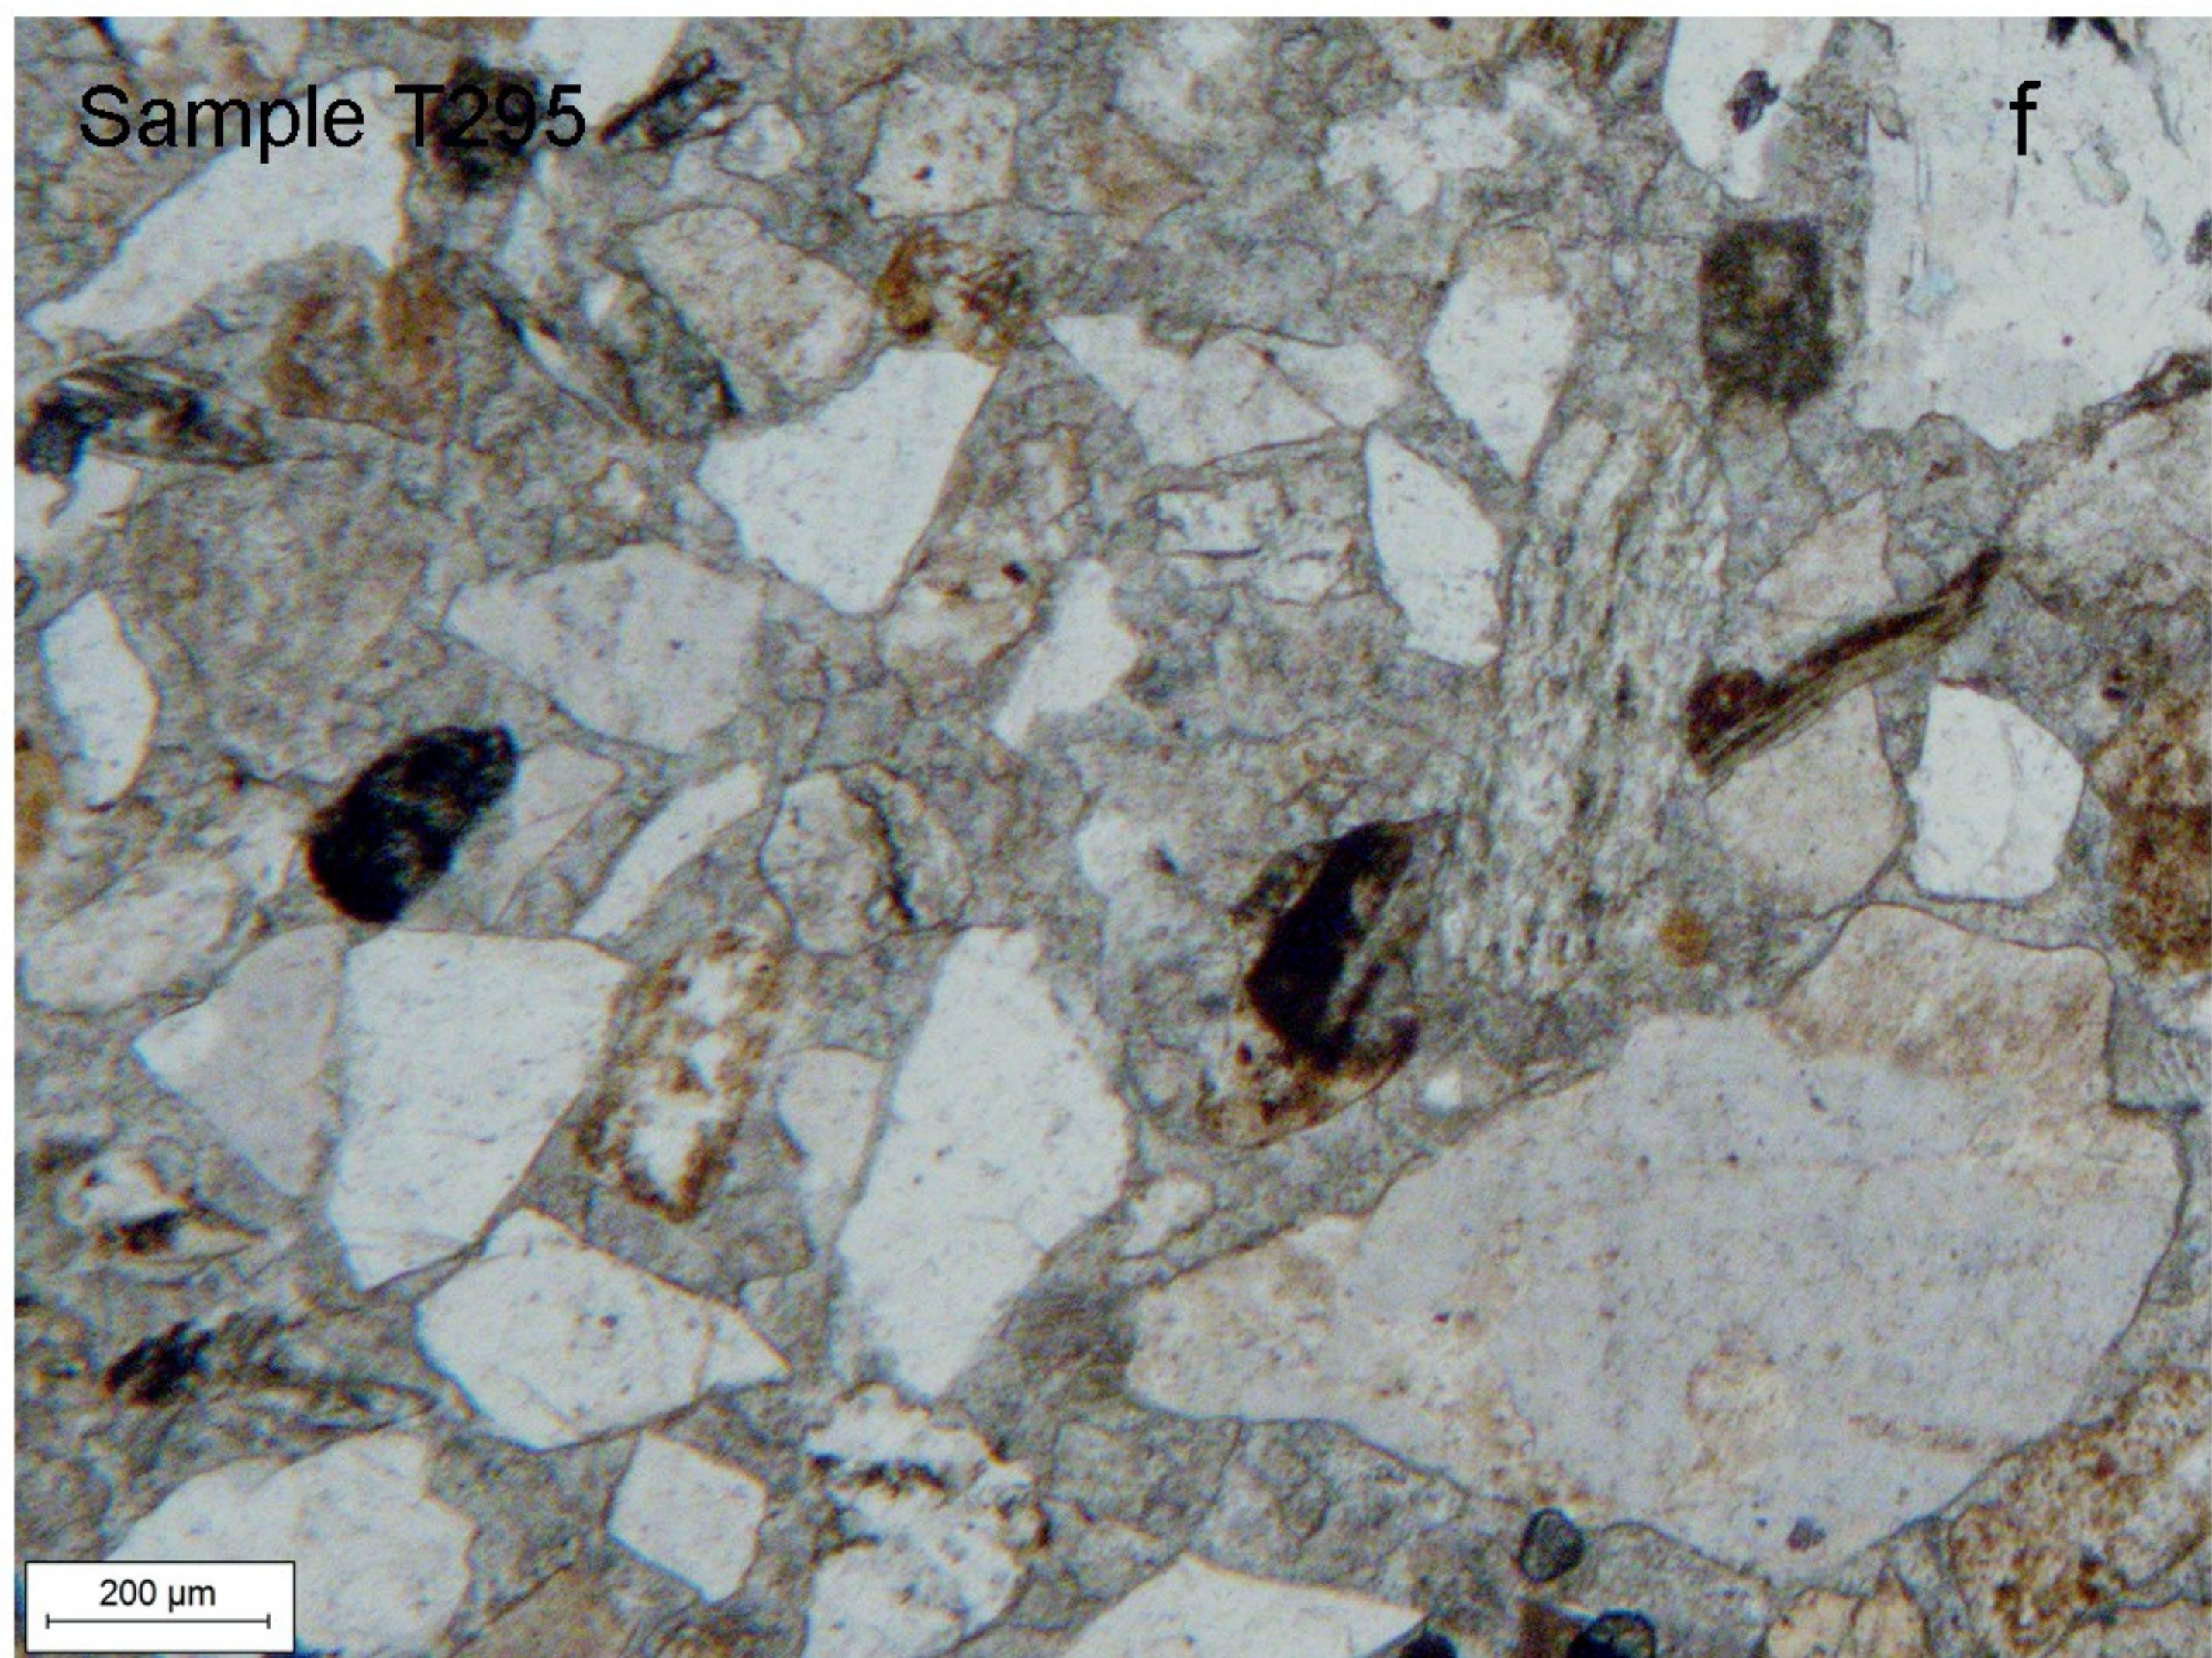



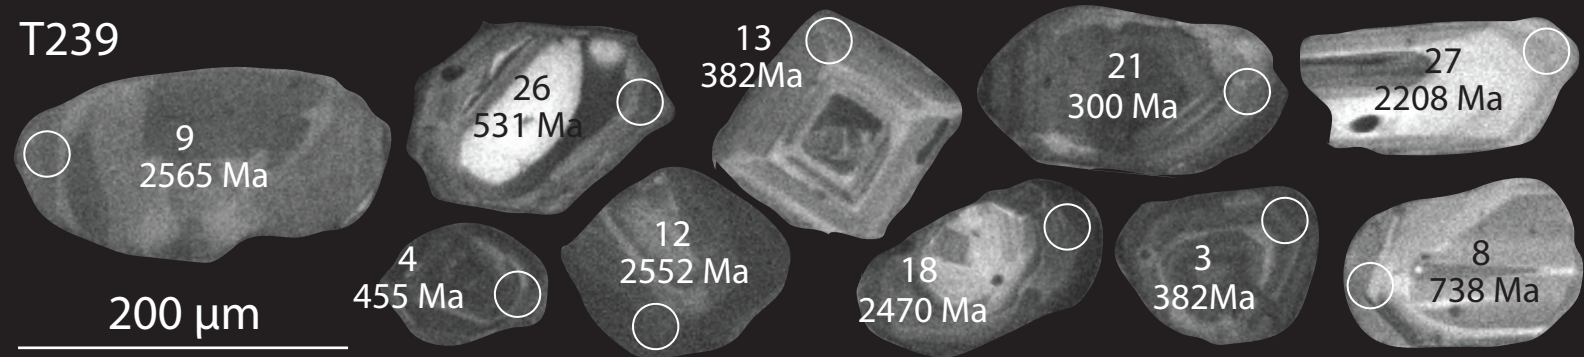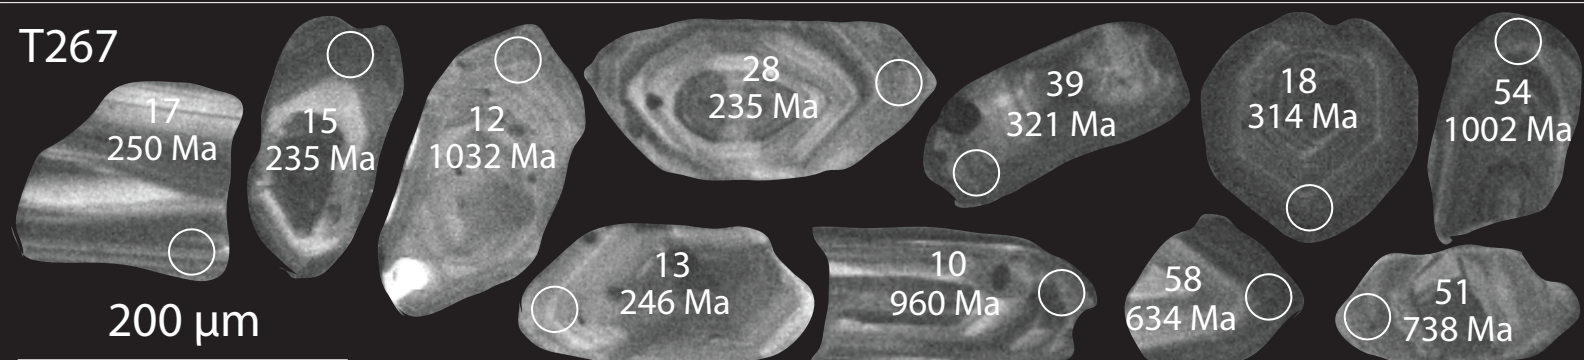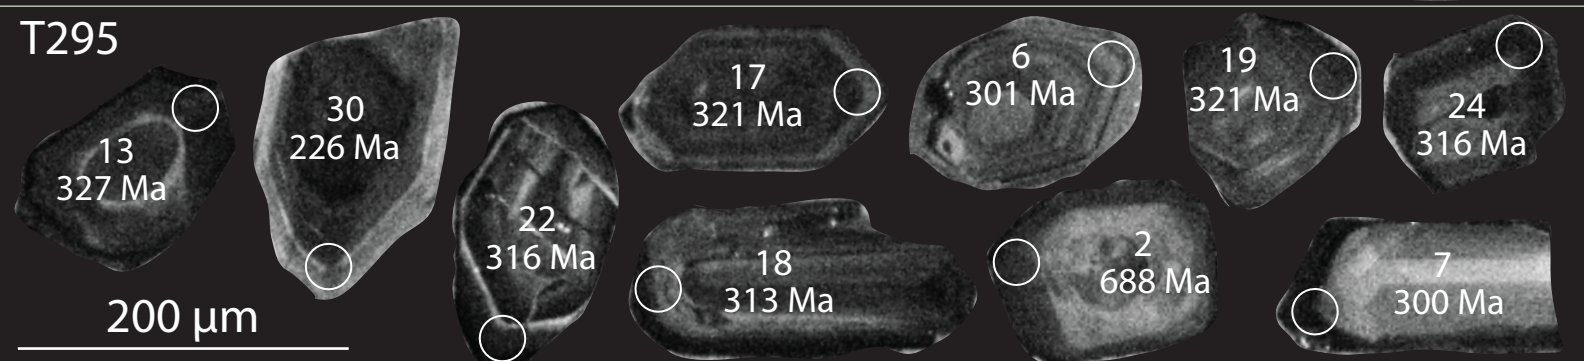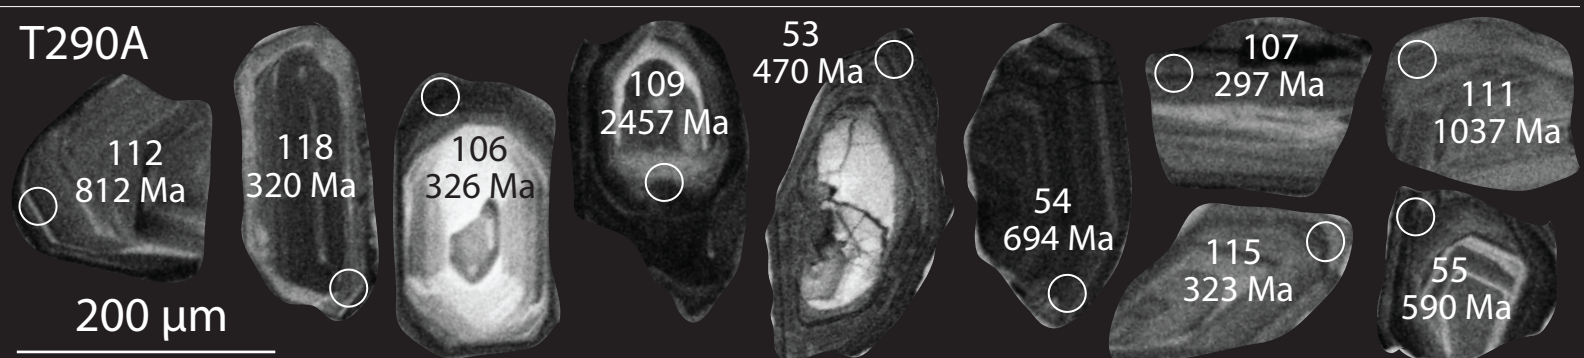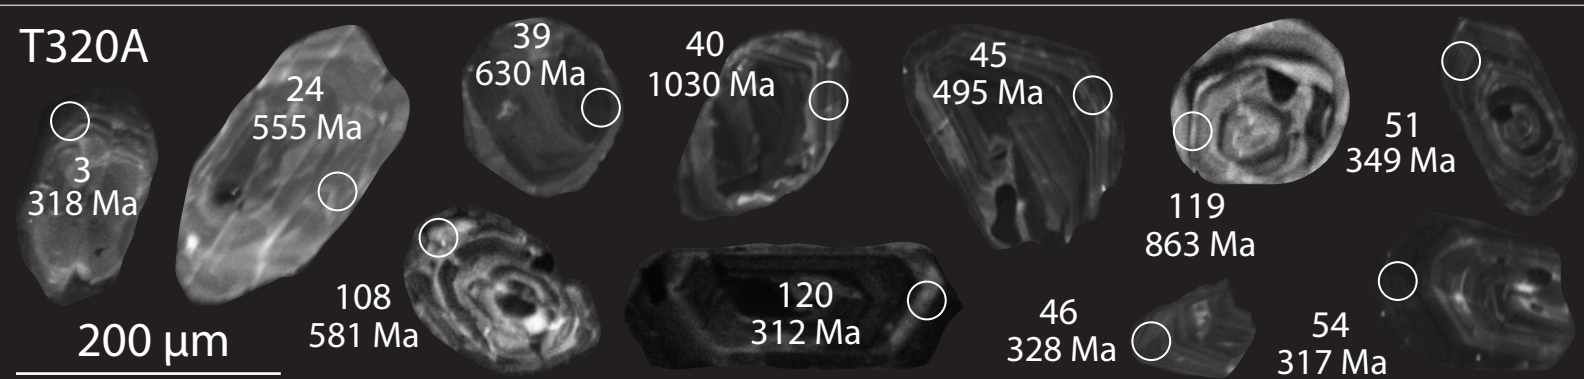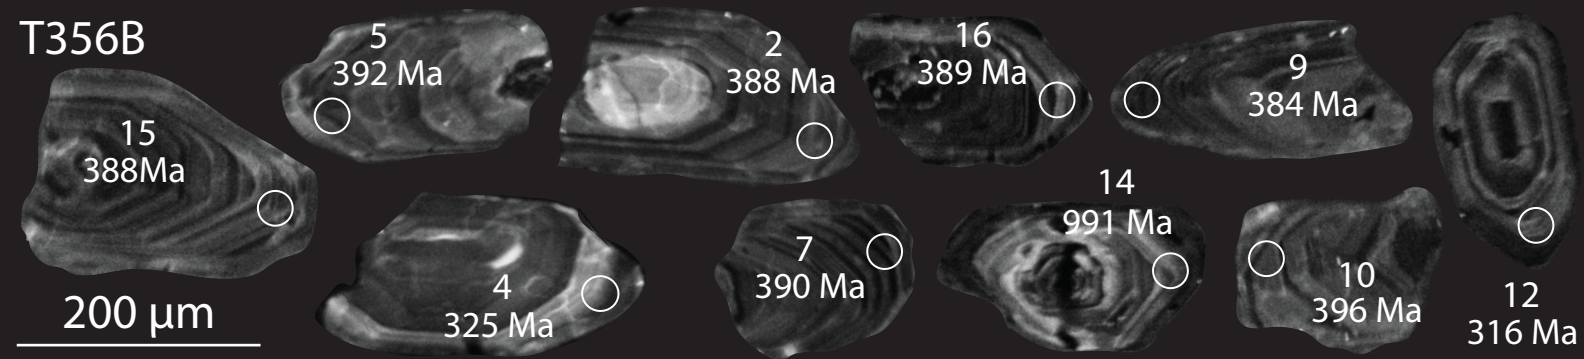



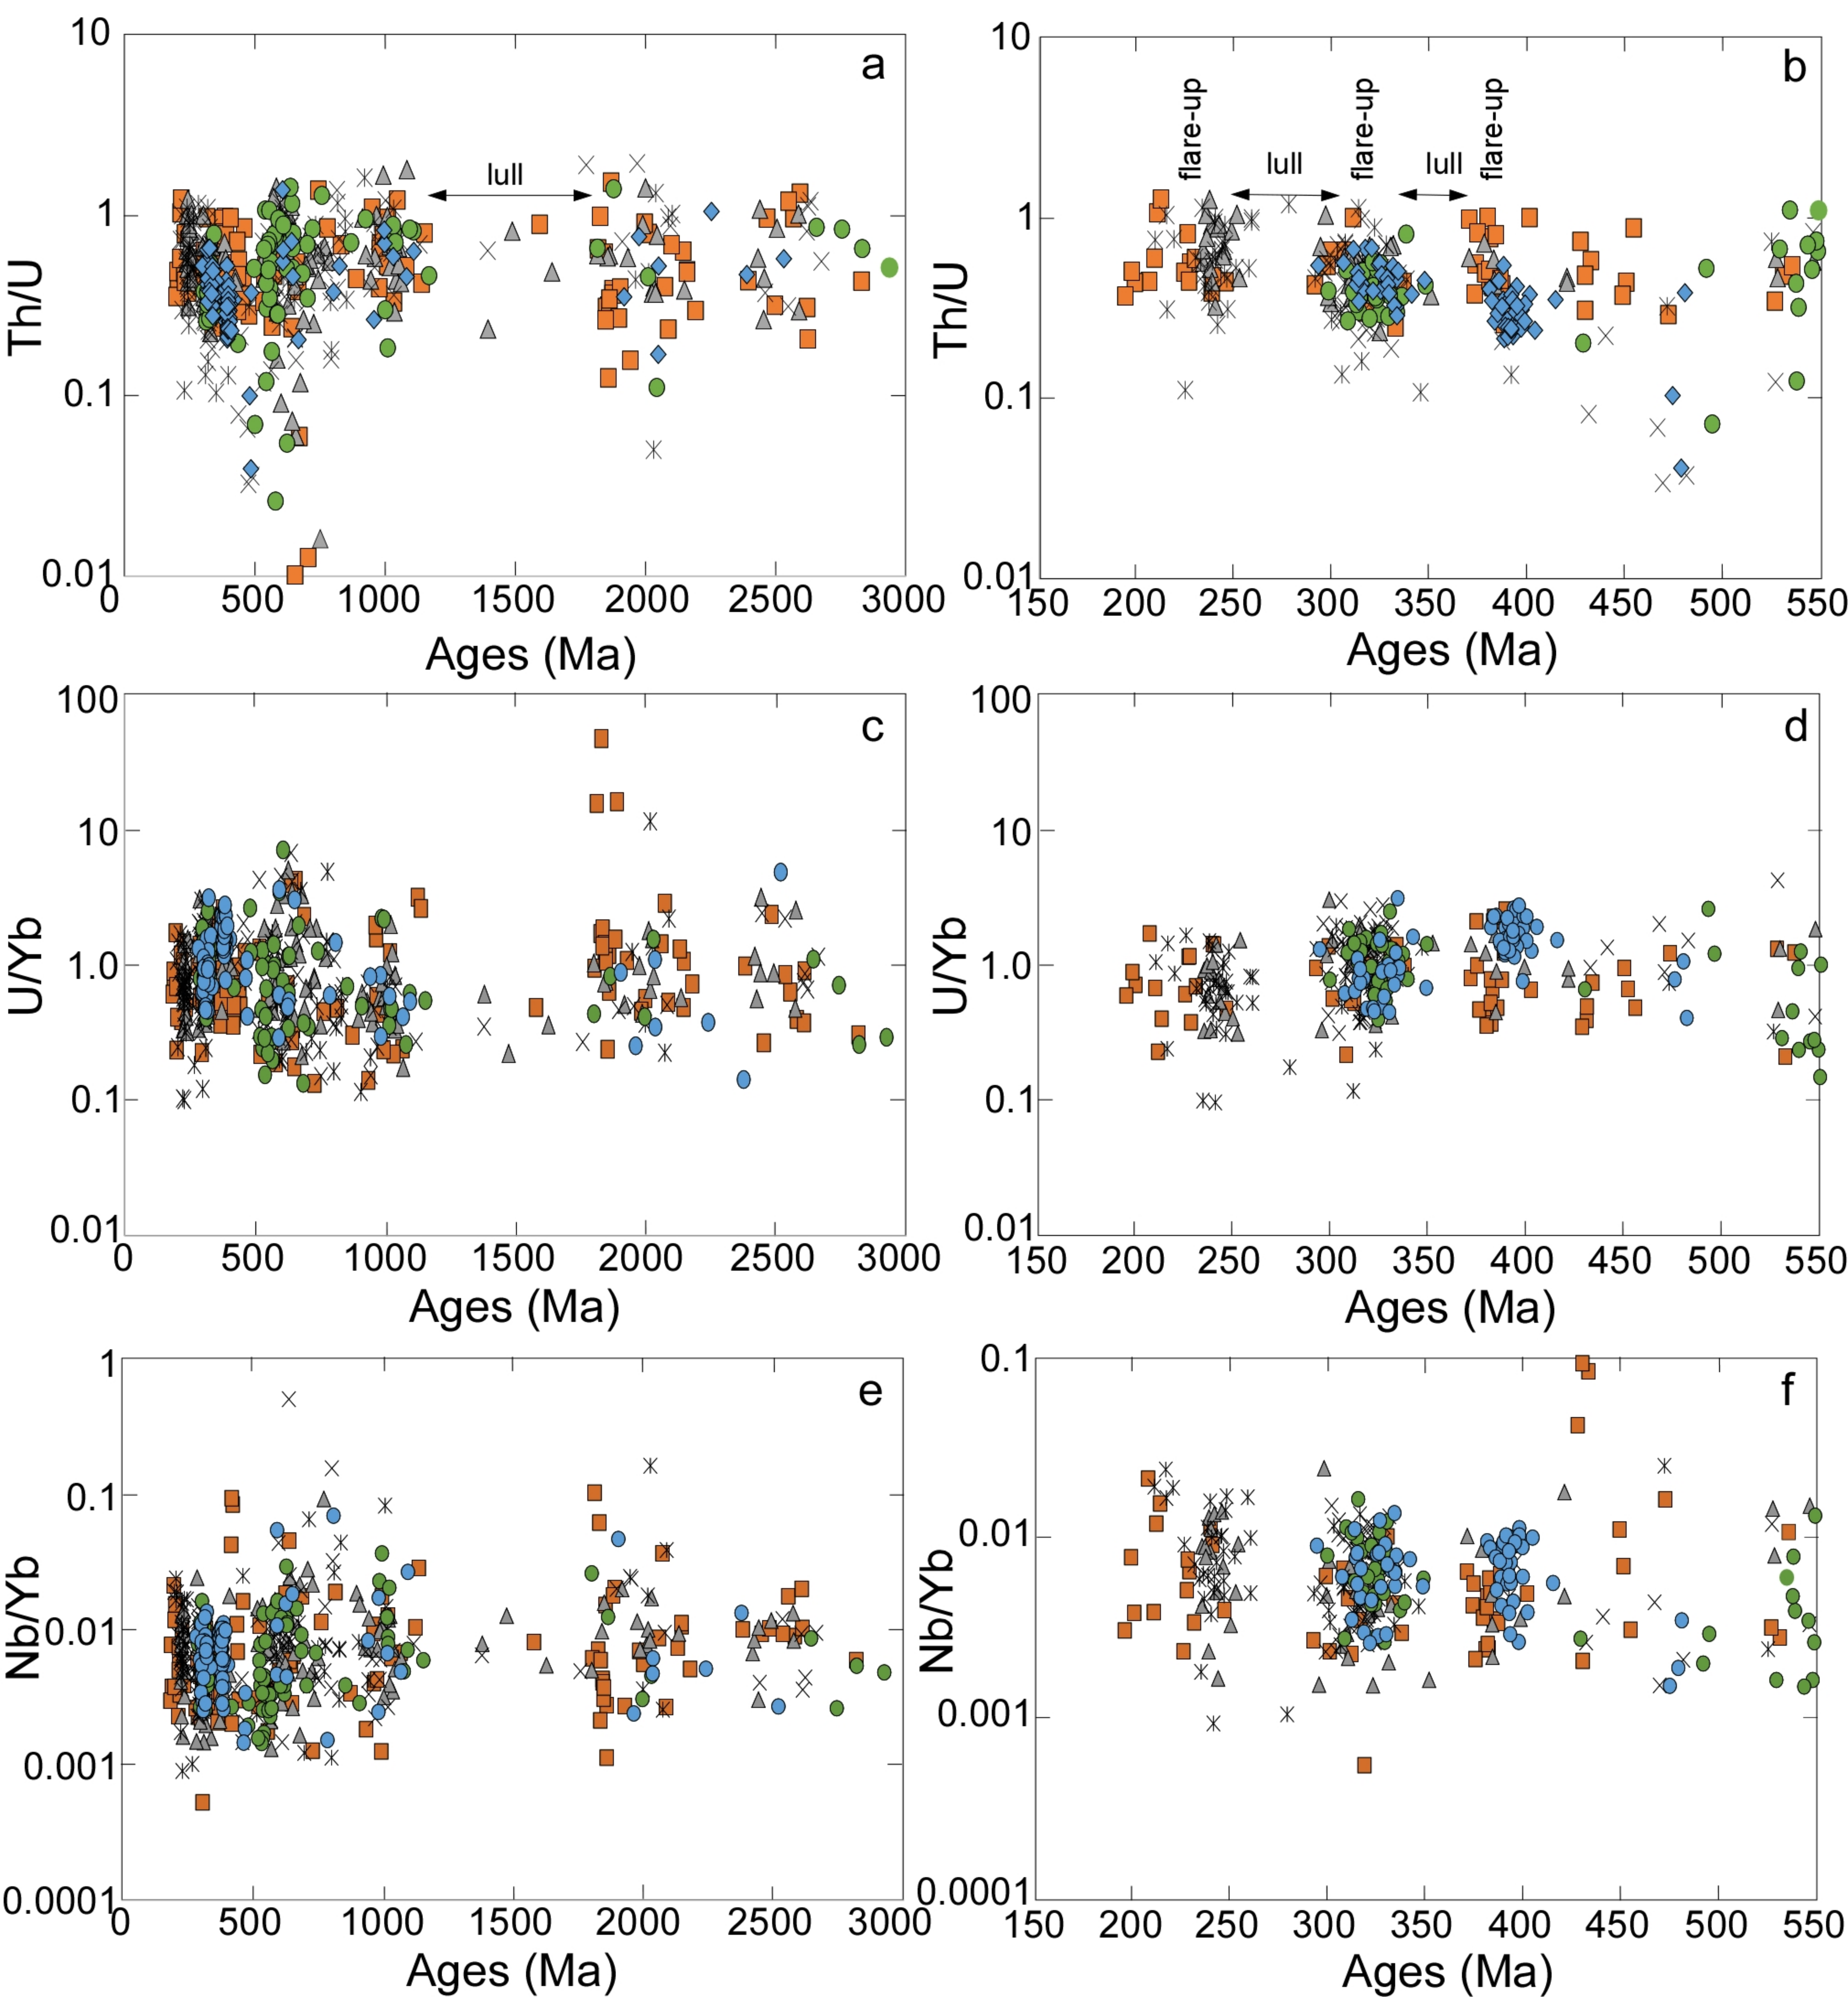



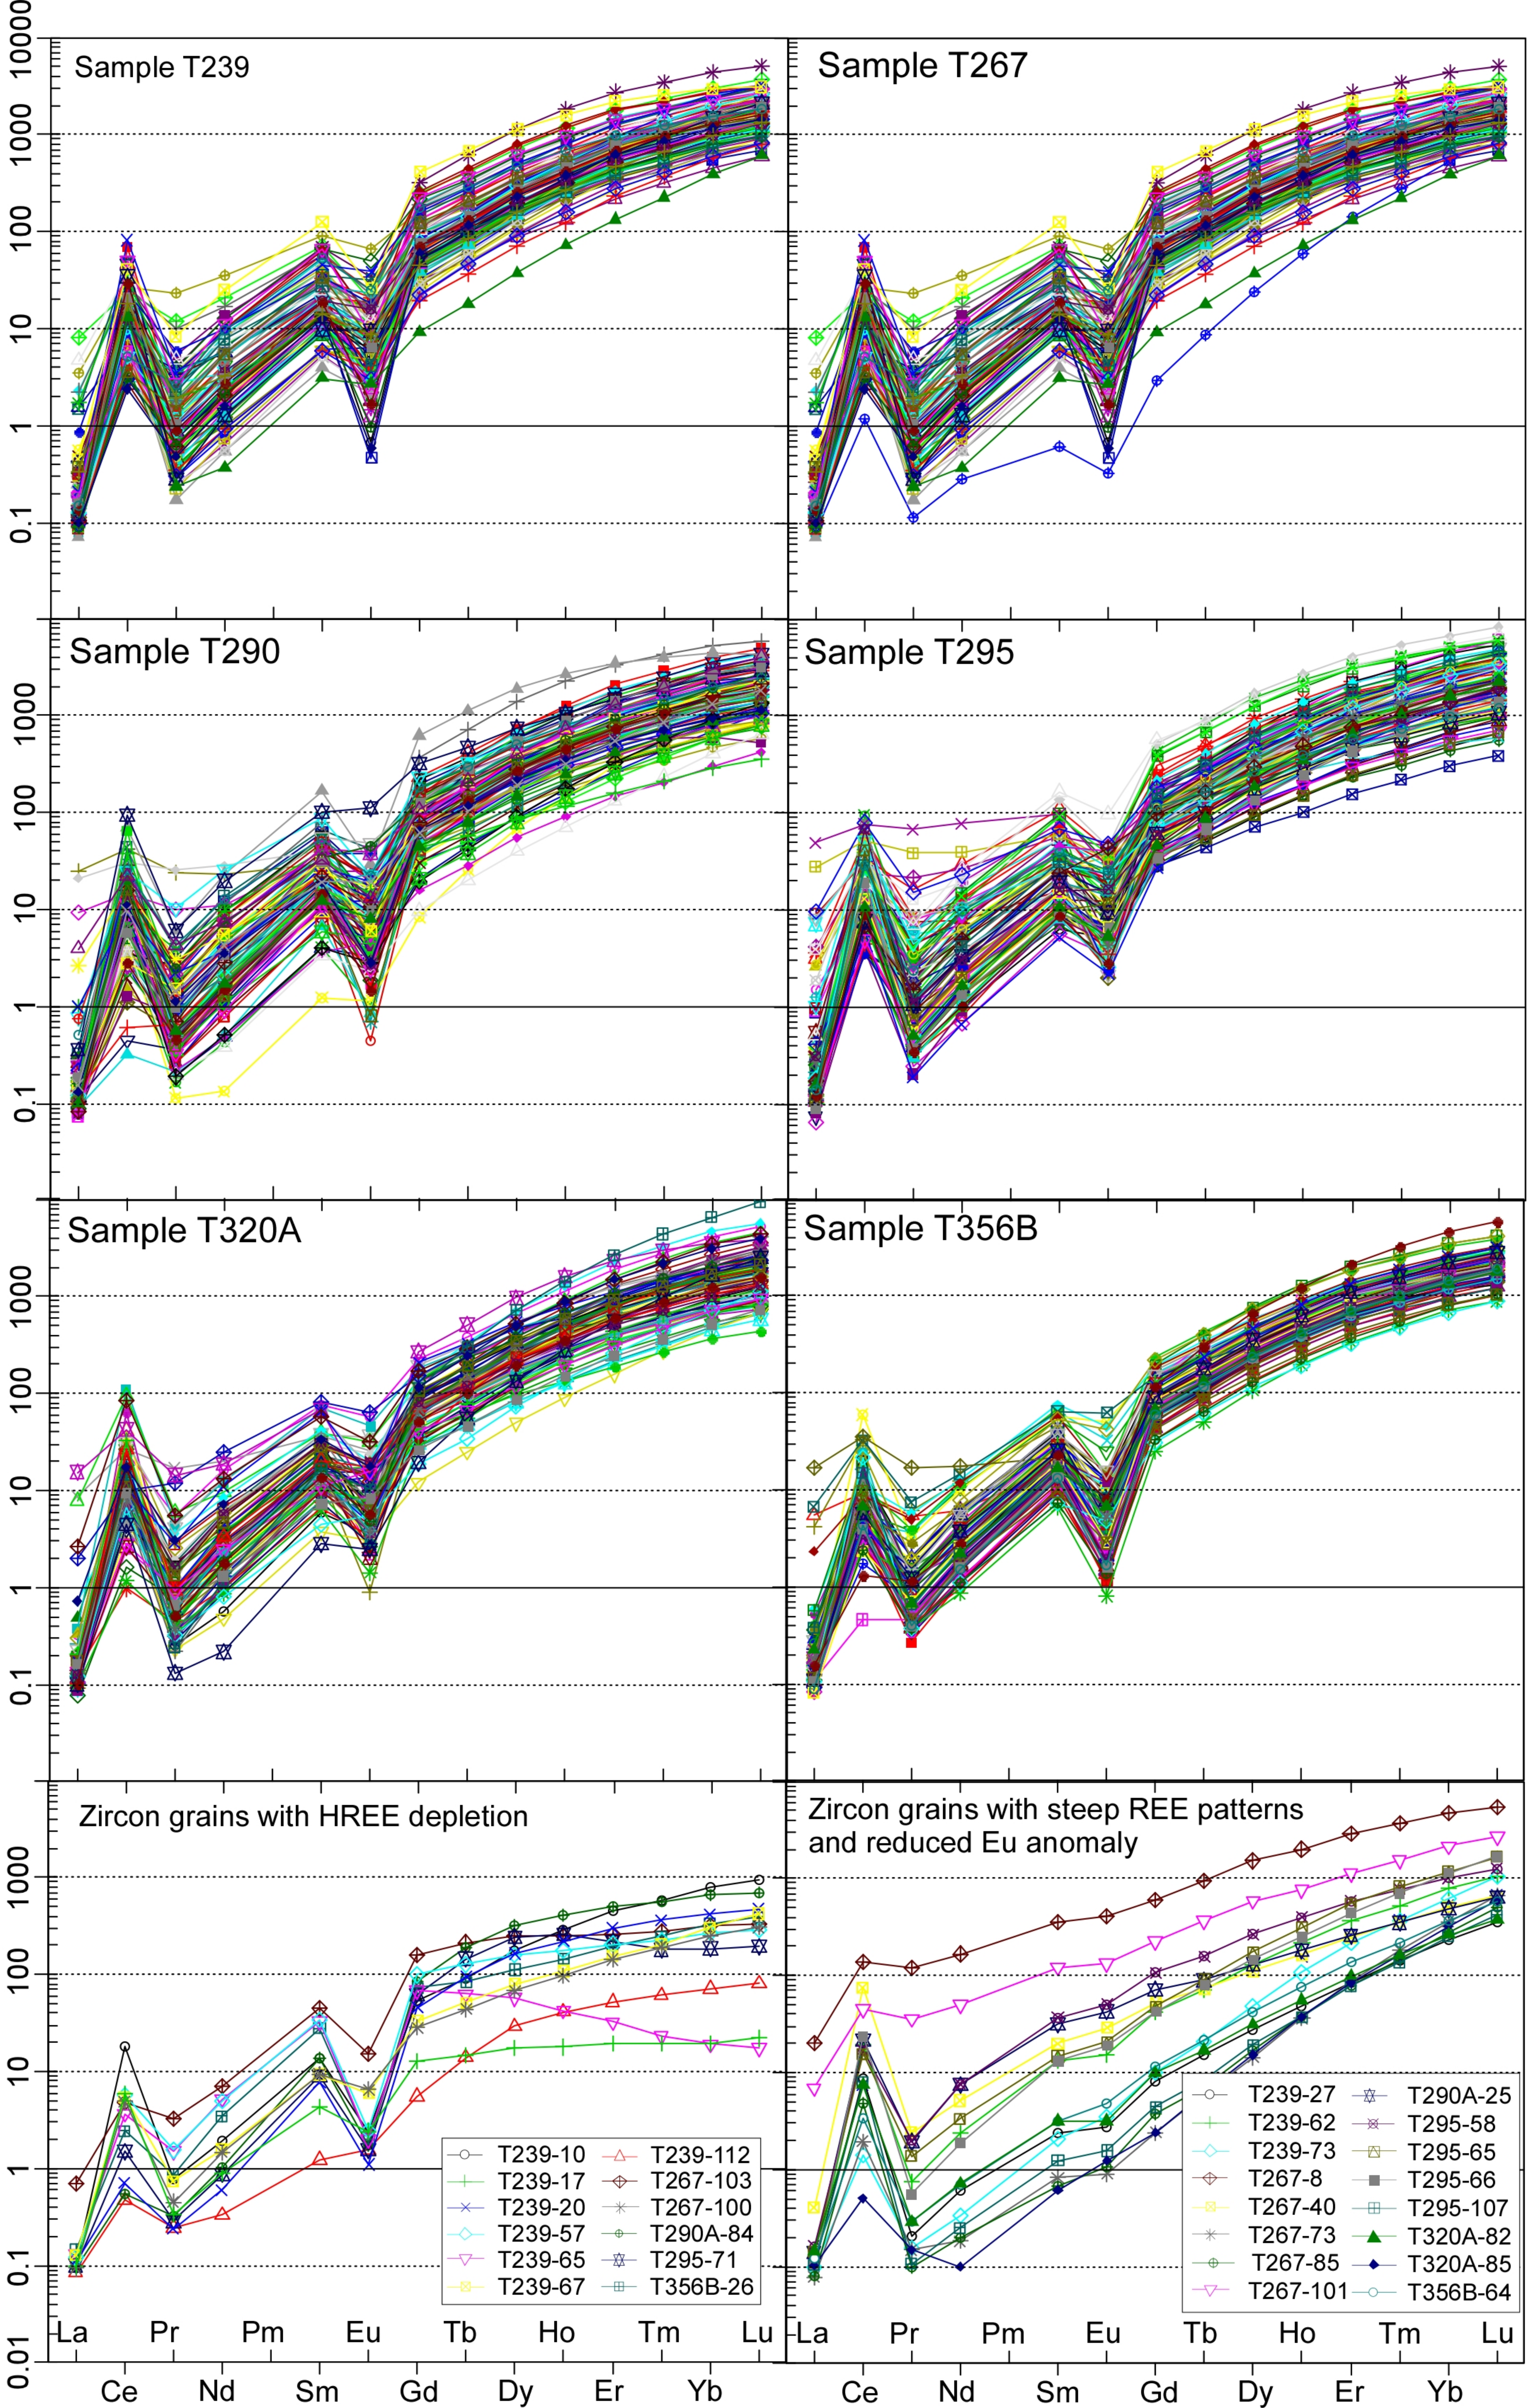



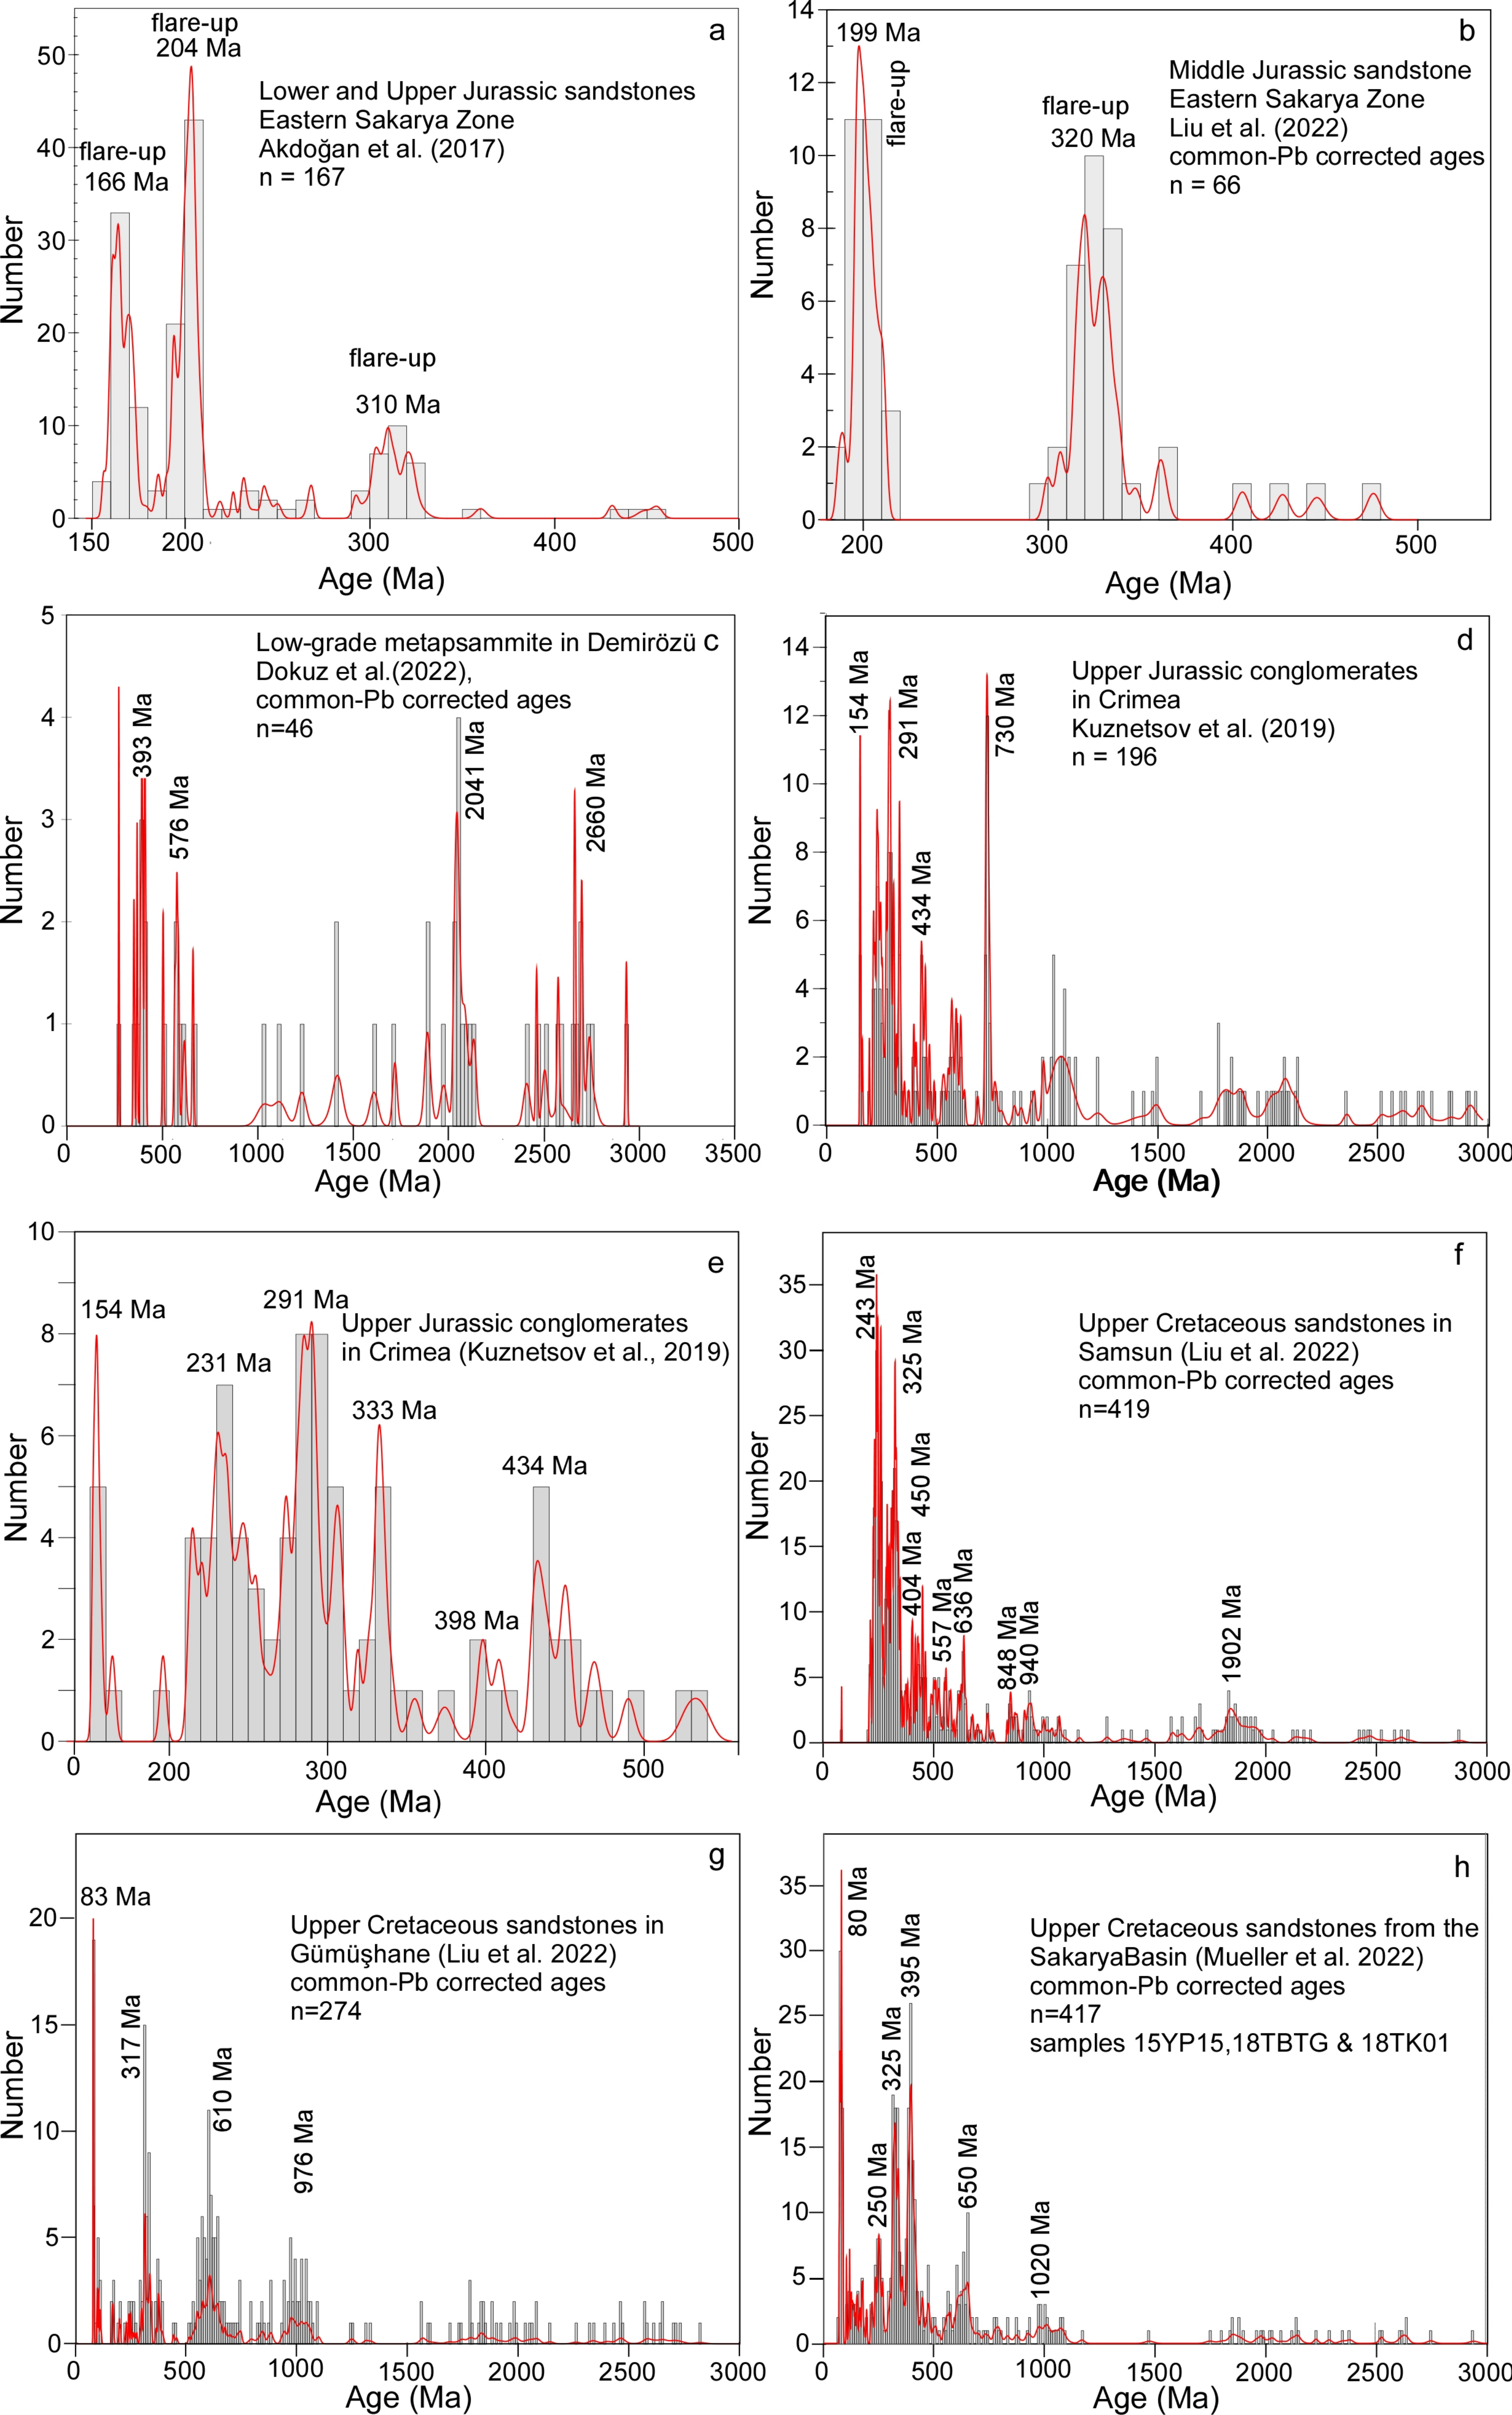



**Table S1.** UTM coordinates of the Middle Permian and Lower Jurassic sandstone samples from the Tokat Massif (Sakarya Zone, Turkey)

| Sample | Lithology                                                         | UTM coordinate        |
|--------|-------------------------------------------------------------------|-----------------------|
| T239   | Lower Jurassic sandstone                                          | 36T 0736978 / 4493890 |
| T267   | Lower Jurassic sandstone                                          | 36T 0707750 / 4478200 |
| T295   | Lower Jurassic sandstone                                          | 36T 0732554 / 4501198 |
| T290A  | Permian sandstone                                                 | 37T 0252160 / 4518273 |
| T320A  | Permian sandstone                                                 | 36T 0745769 / 4517890 |
| T356B  | Fine-grained loose sandstone layer in<br>Middle Permian limestone | 36T 0743685 / 4532082 |
